# Supplementary material for: Constructing a novel expression system by specific activation of amylase expression pathway in Penicillium
Source: Microb Cell Fact. 2020 Jul 29;19:155. doi: 10.1186/s12934-020-01410-4 (PMC7391575; doi:10.1186/s12934-020-01410-4)
Supplement: Supplementary file 7 — Additional file 7: Table S7. Gene list of the 134 genes showed continuously decrease in strains Δ13A, Δ13A-OamyR, Δ13A-OamyR-ΔCreA [file 12934_2020_1410_MOESM7_ESM.xls]

## Sheet: sheet1
Gene_id	Gene_name	Gene_description	Δ13A_1	Δ13A_2	Δ13A_3	Δ13A-OamyR _1	Δ13A-OamyR _2	Δ13A-OamyR _3	Δ13A-OamyR-ΔCreA_1	Δ13A-OamyR-ΔCreA_2	Δ13A-OamyR-ΔCreA_3	Δ13A	Δ13A-OamyR	Δ13A-OamyR-ΔCreA	GO_id	GO_term	KO_id	KO_name	Pathway_id	Pathway_definition	COG_id	COG_Functional Categories	NR_hit-name	NR_description	Swiss-Prot_hit-name	Swiss-Prot_description	Pfam_id	Domain	Domain description
gene-PDE_00021	PDE_00021	hypothetical protein	1906.02	1841.38	1942.19	242.27	252.75	236.23	13.19	13.81	12.41	1896.53	243.75	13.1367	GO:0005576;GO:0009277;GO:0005199	CC:extracellular region;CC:fungal-type cell wall;MF:structural constituent of cell wall;	------	------	------	------	ENOG4111AHP	O:Posttranslational modification, protein turnover, chaperones	EPS25090.1	hypothetical protein PDE_00021 [Penicillium oxalicum 114-2]	sp|P41746|RODL_ASPFU;	Hydrophobin OS=Neosartorya fumigata;	PF01185.18	Hydrophobin	Fungal hydrophobin
gene-PDE_00081	PDE_00081	hypothetical protein	64.87	66.27	67.38	1.27	1.55	1.23	0.15	0.03	0.18	66.1733	1.35	0.12	GO:0016021;GO:0003824;GO:0016874	CC:integral component of membrane;MF:catalytic activity;MF:ligase activity;	K18660	ACSF3	map00280	Valine, leucine and isoleucine degradation	COG0318	S:Function unknown	EPS25150.1	hypothetical protein PDE_00081 [Penicillium oxalicum 114-2]	sp|Q8H151|AAE13_ARATH;	Malonate--CoA ligase OS=Arabidopsis thaliana OX=3702 GN=AAE13 PE=1 SV=2;	PF00501.28;PF13193.6	AMP-binding;AMP-binding_C	AMP-binding enzyme;AMP-binding enzyme C-terminal domain
gene-PDE_00082	PDE_00082	hypothetical protein	111.37	109.15	110.59	3.86	3.79	3.63	0.39	0.07	0.4	110.37	3.76	0.286667	GO:0016787;GO:0008146	MF:hydrolase activity;MF:sulfotransferase activity;	K01025	SULT1	------	------	ENOG4111H56	S:Function unknown	EPS25151.1	hypothetical protein PDE_00082 [Penicillium oxalicum 114-2]	sp|O00338|ST1C2_HUMAN;	Sulfotransferase 1C2 OS=Homo sapiens OX=9606 GN=SULT1C2 PE=1 SV=1;	PF00685.27;PF13469.6	Sulfotransfer_1;Sulfotransfer_3	Sulfotransferase domain;Sulfotransferase family
gene-PDE_00094	PDE_00094	hypothetical protein	601.63	583.08	616.57	124.15	106.41	129.42	21.19	21.73	15.14	600.427	119.993	19.3533	GO:0016021	CC:integral component of membrane;	------	------	------	------	ENOG410ZE7V	S:Function unknown	EPS25163.1	hypothetical protein PDE_00094 [Penicillium oxalicum 114-2]	------	------	------	------	------
gene-PDE_00144	PDE_00144	hypothetical protein	47.73	51.86	67.41	4.25	11.14	19.12	0	0	0	55.6667	11.5033	0	GO:0016021	CC:integral component of membrane;	------	------	------	------	------	------	EPS25212.1	hypothetical protein PDE_00144 [Penicillium oxalicum 114-2]	------	------	------	------	------
gene-PDE_00145	PDE_00145	hypothetical protein	48.99	44.74	46.26	30.05	31.5	29.33	20.82	21.43	23.42	46.6633	30.2933	21.89	GO:0016021	CC:integral component of membrane;	------	------	------	------	ENOG410XZC1	S:Function unknown	EPS25213.1	hypothetical protein PDE_00145 [Penicillium oxalicum 114-2]	------	------	PF09753.9	Use1	Membrane fusion protein Use1
gene-PDE_00287	PDE_00287	hypothetical protein	164.23	172.21	174.76	14.93	11.05	7.18	0	0	0	170.4	11.0533	0	------	------	------	------	------	------	ENOG41125T5	J:Translation, ribosomal structure and biogenesis	EPS25354.1	hypothetical protein PDE_00287 [Penicillium oxalicum 114-2]	------	------	PF11937.8;PF11693.8	DUF3455;DUF2990	Protein of unknown function;Protein of unknown function
gene-PDE_00316	PDE_00316	hypothetical protein	12.62	12.04	12.55	2.59	1.75	2.69	0.47	0.32	0.22	12.4033	2.34333	0.336667	------	------	------	------	------	------	------	------	EPS25383.1	hypothetical protein PDE_00316 [Penicillium oxalicum 114-2]	------	------	------	------	------
gene-PDE_00317	PDE_00317	hypothetical protein	35.21	33.02	41.87	6.26	7.05	8.18	1.17	1.02	0.81	36.7	7.16333	1	GO:0005975;GO:0005576;GO:0052692;GO:0030246;GO:0016301	BP:carbohydrate metabolic process;CC:extracellular region;MF:raffinose alpha-galactosidase activity;MF:carbohydrate binding;MF:kinase activity;	------	------	------	------	ENOG410XPF1;ENOG410YICS	S:Function unknown;	EPS25384.1	hypothetical protein PDE_00317 [Penicillium oxalicum 114-2]	------	------	PF06293.14;PF01636.23	Kdo;APH	Lipopolysaccharide kinase;Phosphotransferase enzyme family
gene-PDE_00413	PDE_00413	hypothetical protein	83.52	104.03	87.67	43.91	34.95	34.54	7.86	15.88	12.71	91.74	37.8	12.15	------	------	------	------	------	------	------	------	EPS25480.1	hypothetical protein PDE_00413 [Penicillium oxalicum 114-2]	------	------	------	------	------
gene-PDE_00508	PDE_00508	hypothetical protein	1619.2	1661.57	1615.29	541.06	537.58	548.7	103.33	108.34	116.38	1632.02	542.447	109.35	GO:0016021	CC:integral component of membrane;	------	------	------	------	------	------	EPS25574.1	hypothetical protein PDE_00508 [Penicillium oxalicum 114-2]	------	------	PF08277.12	PAN_3	PAN-like domain
gene-PDE_00509	PDE_00509	hypothetical protein	4587.28	4600.72	4525.19	904.28	953.95	919.76	322.07	309.8	377.33	4571.06	925.997	336.4	------	------	------	------	------	------	ENOG4111382	S:Function unknown	EPS25575.1	hypothetical protein PDE_00509 [Penicillium oxalicum 114-2]	------	------	------	------	------
gene-PDE_00518	PDE_00518	hypothetical protein	37.55	41.65	40.98	12.32	12.48	11.87	4.61	4.62	4.81	40.06	12.2233	4.68	------	------	------	------	------	------	------	------	EPS25584.1	hypothetical protein PDE_00518 [Penicillium oxalicum 114-2]	------	------	------	------	------
gene-PDE_00633	PDE_00633	hypothetical protein	17.13	18.64	20.88	4.78	4.15	5.09	0.86	0	0.32	18.8833	4.67333	0.393333	------	------	------	------	------	------	ENOG41113PM	S:Function unknown	EPS25699.1	hypothetical protein PDE_00633 [Penicillium oxalicum 114-2]	------	------	------	------	------
gene-PDE_00870	PDE_00870	hypothetical protein	5.41	6.3	6.27	2.18	2.42	2.43	0.84	0.57	0.54	5.99333	2.34333	0.65	GO:0005634;GO:0004523;GO:0003676;GO:0003677	CC:nucleus;MF:RNA-DNA hybrid ribonuclease activity;MF:nucleic acid binding;MF:DNA binding;	K03469	rnhA, RNASEH1	map03030	DNA replication	COG0328	S:Function unknown	EPS25934.1	hypothetical protein PDE_00870 [Penicillium oxalicum 114-2]	sp|Q9UST8|RNH1_SCHPO;	Ribonuclease H OS=Schizosaccharomyces pombe;	PF00075.24	RNase_H	RNase H
gene-PDE_00904	PDE_00904	hypothetical protein	3.06	2.67	2.16	1.33	0.84	1.18	0.09	0.01	0.05	2.63	1.11667	0.05	------	------	------	------	------	------	------	------	EPS25968.1	hypothetical protein PDE_00904 [Penicillium oxalicum 114-2]	------	------	------	------	------
gene-PDE_00955	PDE_00955	hypothetical protein	33.31	35.31	32.03	8.26	8.95	6.38	3.07	2.76	3.75	33.55	7.86333	3.19333	GO:0055085;GO:0016021	BP:transmembrane transport;CC:integral component of membrane;	------	------	------	------	ENOG410XSE0	S:Function unknown	EPS26019.1	hypothetical protein PDE_00955 [Penicillium oxalicum 114-2]	sp|Q4WRQ4|MFSB_ASPFU;	Major facilitator superfamily multidrug transporter mfsB OS=Neosartorya fumigata;	PF07690.16;PF00083.24;PF05977.13	MFS_1;Sugar_tr;MFS_3	Major Facilitator Superfamily;Sugar;Transmembrane secretion effector
gene-PDE_01041	PDE_01041	putative invertase	7.89	8.38	8.17	2.44	2.67	1.79	0.69	0.51	0.72	8.14667	2.3	0.64	GO:0005975;GO:0004553	BP:carbohydrate metabolic process;MF:hydrolase activity, hydrolyzing O-glycosyl compounds;	K01193	INV, sacA	map00500;map00052	Starch and sucrose metabolism;Galactose metabolism	COG1621	K:Transcription	EPS26105.1	putative invertase [Penicillium oxalicum 114-2]	sp|Q01IS8|INV3_ORYSI;	Beta-fructofuranosidase, insoluble isoenzyme 3 OS=Oryza sativa subsp. indica OX=39946 GN=CIN3 PE=2 SV=2;	PF00251.20;PF08244.12	Glyco_hydro_32N;Glyco_hydro_32C	Glycosyl hydrolases family 32 N-terminal domain;Glycosyl hydrolases family 32 C terminal
gene-PDE_01063	PDE_01063	hypothetical protein	4.64	5.21	4.53	2.09	1.11	1.38	0	0.2	0	4.79333	1.52667	0.066667	------	------	------	------	------	------	ENOG4111G2P;ENOG41123IY	S:Function unknown;	EPS26127.1	hypothetical protein PDE_01063 [Penicillium oxalicum 114-2]	------	------	PF12417.8	DUF3669	Zinc finger protein
gene-PDE_01111	PDE_01111	hypothetical protein	28.29	29.04	31.68	10.7	10.2	7.94	2.09	2.26	2.02	29.67	9.61333	2.12333	GO:0006099;GO:0005739;GO:0000287;GO:0003824;GO:0004775;GO:0046872;GO:0016874;GO:0005524	BP:tricarboxylic acid cycle;CC:mitochondrion;MF:magnesium ion binding;MF:catalytic activity;MF:succinate-CoA ligas;MF:metal ion binding;MF:ligase activity;MF:ATP binding;	K01900	LSC2	map00020;map00640	Citrate cycl;Propanoate metabolism	COG0045	S:Function unknown	EPS26175.1	hypothetical protein PDE_01111 [Penicillium oxalicum 114-2]	sp|Q9P567|SUCB_NEUCR;	Succinate--CoA ligase [ADP-forming] subunit beta, mitochondrial OS=Neurospora crassa;	PF08442.10;PF00549.19;PF13549.6;PF01071.19;PF02786.17	ATP-grasp_2;Ligase_CoA;ATP-grasp_5;GARS_A;CPSase_L_D2	ATP-grasp domain;CoA-ligase;ATP-grasp domain;Phosphoribosylglycinamide synthetase, ATP-grasp;Carbamoyl-phosphate synthase L chain, ATP binding domain
gene-PDE_01125	PDE_01125	hypothetical protein	40.1	41.92	42.5	13.74	14.56	17.07	4.98	5.5	5.82	41.5067	15.1233	5.43333	GO:0016874	MF:ligase activity;	------	------	------	------	------	------	EPS26189.1	hypothetical protein PDE_01125 [Penicillium oxalicum 114-2]	------	------	PF12224.8	Amidoligase_2	Putative amidoligase enzyme
gene-PDE_01187	PDE_01187	hypothetical protein	313.28	306.03	304.01	42.33	42.38	37.33	9.8	9.65	11.62	307.773	40.68	10.3567	GO:0006855;GO:0015696;GO:0055085;GO:0035445;GO:0016021;GO:0005886;GO:0008519	BP:drug transmembrane transport;BP:ammonium transport;BP:transmembrane transport;BP:borate transmembrane transport;CC:integral component of membrane;CC:plasma membrane;MF:ammonium transmembrane transporter activity;	------	------	------	------	ENOG410YUTB;ENOG410XQV1	G:Carbohydrate transport and metabolism;	EPS26251.1	hypothetical protein PDE_01187 [Penicillium oxalicum 114-2]	sp|Q9P6J7|YHD3_SCHPO;	Uncharacterized MFS-type transporter C1683.03c OS=Schizosaccharomyces pombe;	PF07690.16;PF00083.24	MFS_1;Sugar_tr	Major Facilitator Superfamily;Sugar
gene-PDE_01192	PDE_01192	hypothetical protein	47.22	43.29	45.9	15.32	15.1	15.36	4.95	5.37	5.09	45.47	15.26	5.13667	------	------	------	------	------	------	ENOG4110BCS	S:Function unknown	EPS26256.1	hypothetical protein PDE_01192 [Penicillium oxalicum 114-2]	------	------	------	------	------
gene-PDE_01256	PDE_01256	putative alpha-1,6-mannanase	23.69	23.16	22.64	6.04	6.37	4.59	0.86	0.67	1.13	23.1633	5.66667	0.886667	GO:0016052;GO:0055085;GO:0016021;GO:0008496	BP:carbohydrate catabolic process;BP:transmembrane transport;CC:integral component of membrane;MF:mannan endo-1,6-alpha-mannosidase activity;	K08257	E3.2.1.101	------	------	ENOG410XTMT	G:Carbohydrate transport and metabolism	EPS26320.1	putative alpha-1,6-mannanase [Penicillium oxalicum 114-2]	sp|P36091|DCW1_YEAST;	Mannan endo-1,6-alpha-mannosidase DCW1 OS=Saccharomyces cerevisiae;	PF03663.14	Glyco_hydro_76	Glycosyl hydrolase family 76
gene-PDE_01418	PDE_01418	hypothetical protein	249.63	237.74	234.41	8.13	8.28	7.38	1.42	1.69	1.1	240.593	7.93	1.40333	GO:0016021;GO:0005506;GO:0016705;GO:0004497;GO:0020037	CC:integral component of membrane;MF:iron ion binding;MF:oxidoreductase activity, acting on paired donors, with incorporation or reduction of molecular oxygen;MF:monooxygenase activity;MF:heme binding;	------	------	------	------	COG2124	S:Function unknown	EPS26481.1	hypothetical protein PDE_01418 [Penicillium oxalicum 114-2]	sp|Q2UNA2|C505_ASPOR;	Bifunctional cytochrome P450/NADPH--P450 reductase OS=Aspergillus oryzae;	PF00067.22	p450	Cytochrome P450
gene-PDE_01637	PDE_01637	hypothetical protein	44.32	49.21	42.01	10.28	11.1	9.61	0.74	0.33	0.46	45.18	10.33	0.51	GO:0006012;GO:0050662;GO:0003824;GO:0003978	BP:galactose metabolic process;MF:coenzyme binding;MF:catalytic activity;MF:UDP-glucose 4-epimerase activity;	K01784	galE, GALE	map00520;map00052	Amino sugar and nucleotide sugar metabolism;Galactose metabolism	COG1087	S:Function unknown	EPS26699.1	hypothetical protein PDE_01637 [Penicillium oxalicum 114-2]	sp|Q9SN58|UGE5_ARATH;	UDP-glucose 4-epimerase 5 OS=Arabidopsis thaliana OX=3702 GN=UGE5 PE=1 SV=3;	PF16363.5;PF01370.21;PF02719.15;PF07993.12;PF01073.19	GDP_Man_Dehyd;Epimerase;Polysacc_synt_2;NAD_binding_4;3Beta_HSD	GDP-mannose 4,6 dehydratase;NAD dependent epimerase/dehydratase family;Polysaccharide biosynthesis protein;Male sterility protein;3-beta hydroxysteroid dehydrogenase/isomerase family
gene-PDE_01652	PDE_01652	hypothetical protein	1615	1723.3	1742.46	17.84	14.45	15.62	1.01	3.88	3.84	1693.59	15.97	2.91	------	------	------	------	------	------	ENOG4110BDS;ENOG4110AN2;ENOG4110AT8	S:Function unknown;	EPS26714.1	hypothetical protein PDE_01652 [Penicillium oxalicum 114-2]	------	------	------	------	------
gene-PDE_01653	PDE_01653	hypothetical protein	419.63	409.85	365.38	29.22	30.35	22.05	2.63	5.81	2.14	398.287	27.2067	3.52667	------	------	------	------	------	------	ENOG4110B93	S:Function unknown	EPS26715.1	hypothetical protein PDE_01653 [Penicillium oxalicum 114-2]	------	------	------	------	------
gene-PDE_01684	PDE_01684	hypothetical protein	162.77	159.67	159.67	81.92	81.77	66.05	29.86	27.39	31.29	160.703	76.58	29.5133	GO:0055085;GO:0016021;GO:0015105	BP:transmembrane transport;CC:integral component of membrane;MF:arsenite transmembrane transporter activity;	------	------	------	------	ENOG4110CVK	S:Function unknown	EPS26745.1	hypothetical protein PDE_01684 [Penicillium oxalicum 114-2]	------	------	PF03600.16;PF02040.15	CitMHS;ArsB	Citrate transporter;Arsenical pump membrane protein
gene-PDE_01701	PDE_01701	hypothetical protein	45.31	45.73	48.35	10.53	8.27	9.69	2.37	3.05	3.41	46.4633	9.49667	2.94333	GO:0034599;GO:0016657	BP:cellular response to oxidative stress;MF:oxidoreductase activity, acting on NA;	K07078	K07078	------	------	COG3560	S:Function unknown	EPS26762.1	hypothetical protein PDE_01701 [Penicillium oxalicum 114-2]	sp|P37261|FRM2_YEAST;	Fatty acid repression mutant protein 2 OS=Saccharomyces cerevisiae;	PF00881.24	Nitroreductase	Nitroreductase family
gene-PDE_01800	PDE_01800	hypothetical protein	44.38	42.78	42.88	17.42	16.57	14.78	5.33	4.63	6.18	43.3467	16.2567	5.38	GO:0005544;GO:0005509	MF:calcium-dependent phospholipid binding;MF:calcium ion binding;	------	------	------	------	ENOG410ZKAM	S:Function unknown	EPS26860.1	hypothetical protein PDE_01800 [Penicillium oxalicum 114-2]	sp|P27006|ANX2A_XENLA;	Annexin A2-A OS=Xenopus laevis OX=8355 GN=anxa2-a PE=2 SV=2;	PF00191.20	Annexin	Annexin
gene-PDE_01898	PDE_01898	hypothetical protein	7.05	4.82	6.27	1.83	1.07	1.68	0.36	0.19	0.39	6.04667	1.52667	0.313333	GO:0016021	CC:integral component of membrane;	------	------	------	------	ENOG4111RNB;ENOG410YDBI	G:Carbohydrate transport and metabolism;S:Function unknown	EPS26958.1	hypothetical protein PDE_01898 [Penicillium oxalicum 114-2]	------	------	------	------	------
gene-PDE_02085	PDE_02085	hypothetical protein	17.44	16.91	17.54	6.9	7.19	8	2.65	2.79	3.06	17.2967	7.36333	2.83333	GO:0016301	MF:kinase activity;	------	------	------	------	ENOG410YFBA	S:Function unknown	EPS27142.1	hypothetical protein PDE_02085 [Penicillium oxalicum 114-2]	sp|Q6CU52|AIM9_KLULA;	Altered inheritance of mitochondria protein 9, mitochondrial OS=Kluyveromyces lactis;	PF01636.23	APH	Phosphotransferase enzyme family
gene-PDE_02530	PDE_02530	hypothetical protein	28.37	26.06	24.91	12.01	12.38	13.34	4.28	3.76	3.53	26.4467	12.5767	3.85667	------	------	------	------	------	------	------	------	EPS27587.1	hypothetical protein PDE_02530 [Penicillium oxalicum 114-2]	------	------	------	------	------
gene-PDE_02854	PDE_02854	hypothetical protein	270.96	250.31	284.71	53.41	51.33	57.24	0.89	1.18	1.02	268.66	53.9933	1.03	------	------	------	------	------	------	ENOG4111QJ0	S:Function unknown	EPS27910.1	hypothetical protein PDE_02854 [Penicillium oxalicum 114-2]	------	------	PF14021.6	TNT	Tuberculosis necrotizing toxin
gene-PDE_02940	PDE_02940	hypothetical protein	107.6	110.9	110.48	40.53	39.57	34.78	16.55	14.27	15.99	109.66	38.2933	15.6033	GO:0016491;GO:0010181	MF:oxidoreductase activity;MF:FMN binding;	------	------	------	------	COG1304	S:Function unknown	EPS27995.1	hypothetical protein PDE_02940 [Penicillium oxalicum 114-2]	sp|Q9HDX2|YKN3_SCHPO;	Uncharacterized lactate 2-monooxygenase PB1A11.03 OS=Schizosaccharomyces pombe;	PF01070.18;PF00478.25	FMN_dh;IMPDH	FMN-dependent dehydrogenase;IMP dehydrogenase / GMP reductase domain
gene-PDE_02988	PDE_02988	hypothetical protein	18.45	15.72	21.87	3.81	3.33	3.85	2.11	0.71	0.89	18.68	3.66333	1.23667	GO:0006629;GO:0016021;GO:0008081	BP:lipid metabolic process;CC:integral component of membrane;MF:phosphoric diester hydrolase activity;	------	------	------	------	ENOG4111N1N;ENOG410XZ22	S:Function unknown;	EPS28042.1	hypothetical protein PDE_02988 [Penicillium oxalicum 114-2]	sp|D4AK17|PLCX1_ARTBC;	PI-PLC X domain-containing protein 1 OS=Arthroderma benhamiae;	------	------	------
gene-PDE_03008	PDE_03008	hypothetical protein	170.62	171.22	172.18	44.67	45.64	34.84	5.38	8.46	7.28	171.34	41.7167	7.04	GO:0005634;GO:0003677	CC:nucleus;MF:DNA binding;	K09425	K09425	------	------	COG5147	O:Posttranslational modification, protein turnover, chaperones	EPS28062.1	hypothetical protein PDE_03008 [Penicillium oxalicum 114-2]	sp|O13493|MYB1_NEUCR;	Myb-like DNA-binding protein myb-1 OS=Neurospora crassa;	PF00249.31;PF13921.6	Myb_DNA-binding;Myb_DNA-bind_6	Myb-like DNA-binding domain;Myb-like DNA-binding domain
gene-PDE_03113	PDE_03113	hypothetical protein	129.63	123.19	132.02	42.98	46.28	41.55	16.63	15.71	17.67	128.28	43.6033	16.67	GO:0016747	MF:transferase activity, transferring acyl groups other than amino-acyl groups;	------	------	------	------	COG0183	U:Intracellular trafficking, secretion, and vesicular transport	EPS28167.1	hypothetical protein PDE_03113 [Penicillium oxalicum 114-2]	sp|P07871|THIKB_RAT;	3-ketoacyl-CoA thiolase B, peroxisomal OS=Rattus norvegicus OX=10116 GN=Acaa1b PE=1 SV=2;	PF00108.23;PF02803.18;PF00109.26	Thiolase_N;Thiolase_C;ketoacyl-synt	Thiolase, N-terminal domain;Thiolase, C-terminal domain;Beta-ketoacyl synthase, N-terminal domain
gene-PDE_03290	PDE_03290	hypothetical protein	479.5	479.75	466	186.07	197.07	150.97	5.91	5.4	6.47	475.083	178.037	5.92667	GO:0016021	CC:integral component of membrane;	------	------	------	------	ENOG410YPH2;ENOG41119BG;ENOG4110XFN	S:Function unknown;	EPS28344.1	hypothetical protein PDE_03290 [Penicillium oxalicum 114-2]	------	------	PF13632.6	Glyco_trans_2_3	Glycosyl transferase family group 2
gene-PDE_03291	PDE_03291	putative beta-1,3-glucanase	651.96	676.7	653.87	244.1	243.89	236.65	8.74	9.43	8.68	660.843	241.547	8.95	GO:0005975;GO:0016021;GO:0004553	BP:carbohydrate metabolic process;CC:integral component of membrane;MF:hydrolase activity, hydrolyzing O-glycosyl compounds;	------	------	------	------	COG2273	S:Function unknown	EPS28345.1	putative beta-1,3-glucanase [Penicillium oxalicum 114-2]	sp|Q8N0N3|BGBP_PENMO;	Beta-1,3-glucan-binding protein OS=Penaeus monodon OX=6687 PE=2 SV=1;	PF00722.21	Glyco_hydro_16	Glycosyl hydrolases family 16
gene-PDE_03575	PDE_03575	hypothetical protein	13.49	14.56	12.98	7.36	7.97	4.86	1.84	1.93	2.13	13.6767	6.73	1.96667	GO:0016021;GO:0042626;GO:0016887;GO:0005524	CC:integral component of membrane;MF:ATPase activity, coupled to transmembrane movement of substances;MF:ATPase activity;MF:ATP binding;	------	------	------	------	COG0842;COG1131	S:Function unknown;	EPS28629.1	hypothetical protein PDE_03575 [Penicillium oxalicum 114-2]	sp|Q4WDD4|ATRF_ASPFU;	ABC multidrug transporter atrF OS=Neosartorya fumigata;	PF01061.24;PF00005.27;PF06422.12;PF14510.6;PF13238.6;PF13191.6;PF03193.16;PF13304.6;PF12698.7;PF13521.6	ABC2_membrane;ABC_tran;PDR_CDR;ABC_trans_N;AAA_18;AAA_16;RsgA_GTPase;AAA_21;ABC2_membrane_3;AAA_28	ABC-2 type transporter;ABC transporter;CDR ABC transporter;ABC-transporter N-terminal;AAA domain;AAA ATPase domain;RsgA GTPase;AAA domain, putative AbiEii toxin, Type IV TA system;ABC-2 family transporter protein;AAA domain
gene-PDE_03633	PDE_03633	hypothetical protein	2494.77	2394.24	2486.62	122.21	105.66	117.21	5.57	9.28	6.56	2458.54	115.027	7.13667	GO:0006351;GO:0016021;GO:0005634;GO:0004497;GO:0003677;GO:0000981;GO:0008270	BP:transcription, DNA-templated;CC:integral component of membrane;CC:nucleus;MF:monooxygenase activity;MF:DNA binding;MF:RNA polymerase II transcription factor activity, sequence-specific DNA binding;MF:zinc ion binding;	------	------	------	------	ENOG4112BNR;ENOG410ZQ4H	S:Function unknown;	EPS28687.1	hypothetical protein PDE_03633 [Penicillium oxalicum 114-2]	sp|A4DA85|ENCC_ASPFU;	Anthrone oxygenase encC OS=Neosartorya fumigata;	PF08592.11	DUF1772	Domain of unknown function
gene-PDE_03955	PDE_03955	hypothetical protein	14.99	15.43	15.18	3.45	0.79	2.68	0.04	1.96	0.26	15.2	2.30667	0.753333	GO:0051560;GO:0005739	BP:mitochondrial calcium ion homeostasis;CC:mitochondrion;	------	------	------	------	ENOG411278Z	S:Function unknown	EPS29009.1	hypothetical protein PDE_03955 [Penicillium oxalicum 114-2]	------	------	PF00035.26	dsrm	Double-stranded RNA binding motif
gene-PDE_03990	PDE_03990	hypothetical protein	603.87	596.37	594.51	132.87	118.06	137.62	15.51	21.95	18.92	598.25	129.517	18.7933	GO:0004386	MF:helicase activity;	------	------	------	------	------	------	EPS29043.1	hypothetical protein PDE_03990 [Penicillium oxalicum 114-2]	------	------	------	------	------
gene-PDE_04100	PDE_04100	hypothetical protein	12.65	11.73	12.33	4.24	25.46	5.84	1.23	1.5	0.62	12.2367	11.8467	1.11667	------	------	------	------	------	------	------	------	EPS29151.1	hypothetical protein PDE_04100 [Penicillium oxalicum 114-2]	------	------	------	------	------
gene-PDE_04101	PDE_04101	hypothetical protein	221.46	237.36	230.22	83.15	87.4	91.86	21.81	16.18	14.65	229.68	87.47	17.5467	------	------	------	------	------	------	ENOG410YSDP	S:Function unknown	EPS29152.1	hypothetical protein PDE_04101 [Penicillium oxalicum 114-2]	sp|D4B0F8|TLP1_ARTBC;	Antigenic thaumatin-like protein ARB_01932 OS=Arthroderma benhamiae;	PF04681.12	Bys1	Blastomyces yeast-phase-specific protein
gene-PDE_04129	PDE_04129	hypothetical protein	19.26	21.31	22.27	3.1	3.79	3.35	0.59	0.49	0.67	20.9467	3.41333	0.583333	GO:0006351;GO:0005634;GO:0008270;GO:0000981;GO:0003677	BP:transcription, DNA-templated;CC:nucleus;MF:zinc ion binding;MF:RNA polymerase II transcription factor activity, sequence-specific DNA binding;MF:DNA binding;	------	------	------	------	ENOG4111IC6	S:Function unknown	EPS29180.1	hypothetical protein PDE_04129 [Penicillium oxalicum 114-2]	sp|Q9UTN0|YII3_SCHPO;	Uncharacterized transcriptional regulatory protein C139.03 OS=Schizosaccharomyces pombe;	PF04082.18;PF00172.18	Fungal_trans;Zn_clus	Fungal specific transcription factor domain;Fungal Z
gene-PDE_04130	PDE_04130	hypothetical protein	6.89	6.86	7.05	0.72	0.67	1.34	0	0	0	6.93333	0.91	0	------	------	------	------	------	------	------	------	EPS29181.1	hypothetical protein PDE_04130 [Penicillium oxalicum 114-2]	------	------	------	------	------
gene-PDE_04225	PDE_04225	hypothetical protein	69.97	72.16	69.37	30.93	32.54	29.53	0.53	0.62	0.62	70.5	31	0.59	GO:0016021	CC:integral component of membrane;	------	------	------	------	ENOG4110BAV	S:Function unknown	EPS29276.1	hypothetical protein PDE_04225 [Penicillium oxalicum 114-2]	------	------	PF11951.8	Fungal_trans_2	Fungal specific transcription factor domain
gene-PDE_04301	PDE_04301	hypothetical protein	52.29	61.69	60.14	1.63	2.7	1.64	0.2	0.11	0.37	58.04	1.99	0.226667	------	------	------	------	------	------	------	------	EPS29352.1	hypothetical protein PDE_04301 [Penicillium oxalicum 114-2]	------	------	------	------	------
gene-PDE_04494	PDE_04494	hypothetical protein	23.75	27.94	27.38	7.62	8.48	7.31	4.06	2.8	2.52	26.3567	7.80333	3.12667	GO:0016021	CC:integral component of membrane;	------	------	------	------	ENOG4112D57	S:Function unknown	EPS29544.1	hypothetical protein PDE_04494 [Penicillium oxalicum 114-2]	------	------	PF02656.15	DUF202	Domain of unknown function
gene-PDE_04497	PDE_04497	hypothetical protein	38.63	37.18	40	7.42	9.28	10.65	1.41	1.88	1.95	38.6033	9.11667	1.74667	GO:0016787	MF:hydrolase activity;	K01046	lip, TGL2	map00561	Glycerolipid metabolism	COG0657	S:Function unknown	EPS29547.1	hypothetical protein PDE_04497 [Penicillium oxalicum 114-2]	sp|Q9US38|YFZ3_SCHPO;	AB hydrolase superfamily protein C1039.03 OS=Schizosaccharomyces pombe;	PF07859.13;PF00326.21;PF00135.28;PF10340.9	Abhydrolase_3;Peptidase_S9;COesterase;Say1_Mug180	alpha/beta hydrolase fold;Prolyl oligopeptidase family;Carboxylesterase family;Steryl acetyl hydrolase
gene-PDE_04527	PDE_04527	hypothetical protein	87.2	83.09	80.54	14.23	16.07	16.31	3.31	4.37	5.07	83.61	15.5367	4.25	GO:0042412;GO:0005506;GO:0017172	BP:taurine biosynthetic process;MF:iron ion binding;MF:cysteine dioxygenase activity;	K00456	CDO1	map00270;map00430	Cysteine and methionine metabolism;Taurine and hypotaurine metabolism	ENOG410XQM4	E:Amino acid transport and metabolism	EPS29577.1	hypothetical protein PDE_04527 [Penicillium oxalicum 114-2]	sp|Q5RLY7|CDO_AJECG;	Cysteine dioxygenase OS=Ajellomyces capsulatus;	PF05995.12;PF07847.12	CDO_I;PCO_ADO	Cysteine dioxygenase type I;PCO_ADO
gene-PDE_04606	PDE_04606	hypothetical protein	6.36	5.06	5.76	0.89	2.63	1.33	0	0	0	5.72667	1.61667	0	------	------	------	------	------	------	ENOG4110AIE	S:Function unknown	EPS29656.1	hypothetical protein PDE_04606 [Penicillium oxalicum 114-2]	------	------	------	------	------
gene-PDE_04612	PDE_04612	hypothetical protein	683.31	671.12	643.42	259.01	267.04	226.64	50.59	51.92	59.37	665.95	250.897	53.96	GO:0016021	CC:integral component of membrane;	------	------	------	------	------	------	EPS29662.1	hypothetical protein PDE_04612 [Penicillium oxalicum 114-2]	------	------	------	------	------
gene-PDE_04614	PDE_04614	hypothetical protein	25.4	22.37	23.55	2.68	4.12	5.16	0.37	0.12	0.07	23.7733	3.98667	0.186667	GO:0005975;GO:0016021;GO:0008061;GO:0004553;GO:0046872;GO:0016491	BP:carbohydrate metabolic process;CC:integral component of membrane;MF:chitin binding;MF:hydrolase activity, hydrolyzing O-glycosyl compounds;MF:metal ion binding;MF:oxidoreductase activity;	K00505	TYR	map00350	Tyrosine metabolism	ENOG410XS94;ENOG410ZP9M;ENOG4110B3F;ENOG4112C44	L:Replication, recombination and repair;S:Function unknown;S:Function unknown;S:Function unknown	EPS29664.1	hypothetical protein PDE_04614 [Penicillium oxalicum 114-2]	sp|Q5BGU9|IVOB_EMENI;	N-acetyl-6-hydroxytryptophan oxidase ivoB OS=Emericella nidulans;	PF00264.20	Tyrosinase	Common central domain of tyrosinase
gene-PDE_04801	PDE_04801	hypothetical protein	133.69	146.18	136.51	76.67	64.55	61.6	18.72	16.98	24.65	138.793	67.6067	20.1167	GO:0016021	CC:integral component of membrane;	------	------	------	------	COG5594	S:Function unknown	EPS29851.1	hypothetical protein PDE_04801 [Penicillium oxalicum 114-2]	sp|O43022|YGV8_SCHPO;	Uncharacterized protein C354.08c OS=Schizosaccharomyces pombe;	PF02714.15;PF13967.6;PF14703.6	RSN1_7TM;RSN1_TM;PHM7_cyt	Calcium-dependent channel, 7TM region, putative phosphate;Late exocytosis, associated with Golgi transport;Cytosolic domain of 10TM putative phosphate transporter
gene-PDE_04811	PDE_04811	hypothetical protein	6.31	7.74	6.43	3.63	3.07	2.56	0.58	0.79	0.85	6.82667	3.08667	0.74	GO:0006914;GO:0006865;GO:0016021;GO:0005774	BP:autophagy;BP:amino acid transport;CC:integral component of membrane;CC:vacuolar membrane;	------	------	------	------	COG2270	S:Function unknown	EPS29861.1	hypothetical protein PDE_04811 [Penicillium oxalicum 114-2]	sp|A7KAM9|AT221_PENRW;	Autophagy-related protein 22-1 OS=Penicillium rubens;	PF11700.8;PF07690.16	ATG22;MFS_1	Vacuole effluxer Atg22 like;Major Facilitator Superfamily
gene-PDE_04812	PDE_04812	hypothetical protein	340.05	346.67	344.63	139.69	145.82	133.86	24.5	27.07	26.83	343.783	139.79	26.1333	GO:0055085;GO:0016021;GO:0005887	BP:transmembrane transport;CC:integral component of membrane;CC:integral component of plasma membrane;	------	------	------	------	ENOG410Y3SX;ENOG410XNQK;ENOG410YJHV	G:Carbohydrate transport and metabolism;	EPS29862.1	hypothetical protein PDE_04812 [Penicillium oxalicum 114-2]	sp|B6HJU0|ROQT_PENRW;	Efflux pump roqT OS=Penicillium rubens;	PF07690.16;PF06609.13	MFS_1;TRI12	Major Facilitator Superfamily;Fungal trichothecene efflux pump
gene-PDE_04823	PDE_04823	hypothetical protein	40.31	45.57	37.7	31.57	28.25	29.44	12.88	11.84	15.1	41.1933	29.7533	13.2733	GO:0016126;GO:0008299;GO:0004421	BP:sterol biosynthetic process;BP:isoprenoid biosynthetic process;MF:hydroxymethylglutaryl-CoA synthase activity;	K01641	E2.3.3.10	map00650;map00280;map00072;map00900	Butanoate metabolism;Valine, leucine and isoleucine degradation;Synthesis and degradation of ketone bodies;Terpenoid backbone biosynthesis	COG3425	I:Lipid transport and metabolism	EPS29873.1	hypothetical protein PDE_04823 [Penicillium oxalicum 114-2]	sp|P54839|HMCS_YEAST;	Hydroxymethylglutaryl-CoA synthase OS=Saccharomyces cerevisiae;	PF08540.10;PF01154.17	HMG_CoA_synt_C;HMG_CoA_synt_N	Hydroxymethylglutaryl-coenzyme A synthase C terminal;Hydroxymethylglutaryl-coenzyme A synthase N terminal
gene-PDE_04899	PDE_04899	hypothetical protein	55.97	52.98	48.43	11.33	10.65	8.84	1.44	2.27	1.88	52.46	10.2733	1.86333	------	------	------	------	------	------	ENOG410YNKN	S:Function unknown	EPS29949.1	hypothetical protein PDE_04899 [Penicillium oxalicum 114-2]	------	------	------	------	------
gene-PDE_04914	PDE_04914	hypothetical protein	63.81	62.43	61.58	14.42	14.1	13.25	4.05	4.03	4.22	62.6067	13.9233	4.1	GO:0055085;GO:0016021	BP:transmembrane transport;CC:integral component of membrane;	K08158	MDR1, FLR1, CAF5	------	------	ENOG4110Z27;COG0477	U:Intracellular trafficking, secretion, and vesicular transport;	EPS29964.1	hypothetical protein PDE_04914 [Penicillium oxalicum 114-2]	sp|O94528|CAF5_SCHPO;	Caffeine resistance protein 5 OS=Schizosaccharomyces pombe;	PF07690.16	MFS_1	Major Facilitator Superfamily
gene-PDE_05067	PDE_05067	hypothetical protein	274.63	284.67	268.31	25.18	25.69	23.89	4.49	3.43	4.1	275.87	24.92	4.00667	GO:0016021	CC:integral component of membrane;	------	------	------	------	ENOG410YETN;ENOG410YT3Y	S:Function unknown;	EPS30117.1	hypothetical protein PDE_05067 [Penicillium oxalicum 114-2]	------	------	------	------	------
gene-PDE_05254	PDE_05254	hypothetical protein	10.45	10.8	10.05	2.92	3.51	2.68	0.37	0.64	0.26	10.4333	3.03667	0.423333	GO:0005634;GO:0003700;GO:0043565;GO:0000976	CC:nucleus;MF:transcription factor activity, sequence-specific DNA binding;MF:sequence-specific DNA binding;MF:transcription regulatory region sequence-specific DNA binding;	------	------	------	------	ENOG4112BZT;COG5025	K:Transcription;	EPS30303.1	hypothetical protein PDE_05254 [Penicillium oxalicum 114-2]	sp|B4JSC2|FOXO_DROGR;	Forkhead box protein O OS=Drosophila grimshawi OX=7222 GN=foxo PE=3 SV=1;	PF00250.18	Forkhead	Forkhead domain
gene-PDE_05310	PDE_05310	hypothetical protein	14.53	13.57	14.29	1.83	2.98	2.82	0.15	0.61	0.84	14.13	2.54333	0.533333	GO:0055085;GO:0019500;GO:0016021;GO:0016810;GO:0030196	BP:transmembrane transport;BP:cyanide catabolic process;CC:integral component of membrane;MF:hydrolase activity, acting on carbon-nitroge;MF:cyanide hydratase activity;	K10675	E4.2.1.66	map00460	Cyanoamino acid metabolism	COG0388	U:Intracellular trafficking, secretion, and vesicular transport	EPS30359.1	hypothetical protein PDE_05310 [Penicillium oxalicum 114-2]	sp|B6HCY4|CHT_PENRW;	Cyanide hydratase OS=Penicillium rubens;	PF00795.22	CN_hydrolase	Carbon-nitrogen hydrolase
gene-PDE_05433	PDE_05433	hypothetical protein	22.66	23.89	22.91	3.6	4.21	3.85	1.41	1.05	1.08	23.1533	3.88667	1.18	GO:0016021	CC:integral component of membrane;	------	------	------	------	ENOG410YJSH	S:Function unknown	EPS30482.1	hypothetical protein PDE_05433 [Penicillium oxalicum 114-2]	------	------	------	------	------
gene-PDE_05452	PDE_05452	hypothetical protein	28.73	29.37	26.73	13.95	14.33	13.4	4.01	3.49	3.16	28.2767	13.8933	3.55333	------	------	------	------	------	------	------	------	EPS30501.1	hypothetical protein PDE_05452 [Penicillium oxalicum 114-2]	------	------	------	------	------
gene-PDE_05453	PDE_05453	hypothetical protein	520.33	503.94	503.63	145.61	151.25	130.13	37.31	36.98	42.09	509.3	142.33	38.7933	GO:0005634;GO:0008270;GO:0000981;GO:0003677	CC:nucleus;MF:zinc ion binding;MF:RNA polymerase II transcription factor activity, sequence-specific DNA binding;MF:DNA binding;	K21547	PRO1, NOSA	------	------	ENOG410XTBB;ENOG410Y63I	K:Transcription;	EPS30502.1	hypothetical protein PDE_05453 [Penicillium oxalicum 114-2]	sp|Q4WPL7|NOSA_ASPFU;	C6 finger domain transcription factor nosA OS=Neosartorya fumigata;	PF11951.8;PF00172.18	Fungal_trans_2;Zn_clus	Fungal specific transcription factor domain;Fungal Z
gene-PDE_05454	PDE_05454	hypothetical protein	393.52	413.39	396.77	111.8	116.97	119.08	33.28	34.23	48.6	401.227	115.95	38.7033	------	------	------	------	------	------	ENOG4112A0V	S:Function unknown	EPS30503.1	hypothetical protein PDE_05454 [Penicillium oxalicum 114-2]	------	------	------	------	------
gene-PDE_05586	PDE_05586	hypothetical protein	16.75	19.86	21.89	6.44	5.84	8.96	2.33	2.77	1.81	19.5	7.08	2.30333	GO:0016021	CC:integral component of membrane;	K07112	K07112	------	------	COG2391	S:Function unknown	EPS30634.1	hypothetical protein PDE_05586 [Penicillium oxalicum 114-2]	sp|Q87AD3|Y1893_XYLFT;	UPF0394 membrane protein PD_1893 OS=Xylella fastidiosa;	PF04143.14	Sulf_transp	Sulphur transport
gene-PDE_05592	PDE_05592	hypothetical protein	18.42	24.39	18.69	3.52	2.24	4.19	6.23	1.09	1.14	20.5	3.31667	2.82	GO:0003676;GO:0005524;GO:0004386	MF:nucleic acid binding;MF:ATP binding;MF:helicase activity;	K20103	DDX60	------	------	COG4581	S:Function unknown	EPS30640.1	hypothetical protein PDE_05592 [Penicillium oxalicum 114-2]	sp|Q9P7T8|YIW2_SCHPO;	Uncharacterized helicase C694.02 OS=Schizosaccharomyces pombe;	PF00270.29;PF04851.15;PF00271.31	DEAD;ResIII;Helicase_C	DEAD/DEAH box helicase;Type III restriction enzyme, res subunit;Helicase conserved C-terminal domain
gene-PDE_05900	PDE_05900	hypothetical protein	67.19	61.16	63.58	13.26	16.07	12.27	2.7	3.82	3.07	63.9767	13.8667	3.19667	GO:0016021	CC:integral component of membrane;	------	------	------	------	ENOG4111XBC;ENOG41122Z6	O:Posttranslational modification, protein turnover, chaperones;	EPS30946.1	hypothetical protein PDE_05900 [Penicillium oxalicum 114-2]	sp|Q75BG6|JID1_ASHGO;	J domain-containing protein 1 OS=Ashbya gossypii;	PF00226.31	DnaJ	DnaJ domain
gene-PDE_05972	PDE_05972	hypothetical protein	26.56	29.09	28.16	4.26	2.09	3.98	0.37	0.44	0.41	27.9367	3.44333	0.406667	------	------	------	------	------	------	------	------	EPS31018.1	hypothetical protein PDE_05972 [Penicillium oxalicum 114-2]	------	------	------	------	------
gene-PDE_06025	PDE_06025	hypothetical protein	6.78	7.5	8.04	2.8	2.96	2.81	0.51	0.27	0.52	7.44	2.85667	0.433333	GO:0016021;GO:0022857	CC:integral component of membrane;MF:transmembrane transporter activity;	------	------	------	------	COG0477;ENOG410XNQK	S:Function unknown;G:Carbohydrate transport and metabolism	EPS31071.1	hypothetical protein PDE_06025 [Penicillium oxalicum 114-2]	sp|P32466|HXT3_YEAST;	Low-affinity glucose transporter HXT3 OS=Saccharomyces cerevisiae;	PF00083.24;PF07690.16	Sugar_tr;MFS_1	Sugar;Major Facilitator Superfamily
gene-PDE_06034	PDE_06034	hypothetical protein	1800.02	1794.58	1682.82	321.81	319.55	348.03	41.54	44.62	41.45	1759.14	329.797	42.5367	------	------	------	------	------	------	ENOG410XRDP;ENOG410YPXB	S:Function unknown;	EPS31080.1	hypothetical protein PDE_06034 [Penicillium oxalicum 114-2]	sp|L7NCS1|NLP10_PHYCP;	NLP effector protein 10 OS=Phytophthora capsici OX=4784 GN=NLP10 PE=2 SV=1;	PF05630.11	NPP1	Necrosis inducing protein
gene-PDE_06035	PDE_06035	hypothetical protein	2395.16	2363.44	2296.94	651.37	647.92	690.79	95.35	85.94	76.69	2351.85	663.36	85.9933	------	------	------	------	------	------	ENOG410YPXB	S:Function unknown	EPS31081.1	hypothetical protein PDE_06035 [Penicillium oxalicum 114-2]	------	------	------	------	------
gene-PDE_06059	PDE_06059	hypothetical protein	14	13.64	12.16	5.11	6.17	4.8	0.56	0.4	0.68	13.2667	5.36	0.546667	GO:0003824;GO:0016874	MF:catalytic activity;MF:ligase activity;	------	------	------	------	COG0318	S:Function unknown	EPS31104.1	hypothetical protein PDE_06059 [Penicillium oxalicum 114-2]	sp|A2QTE5|EPAB_ASPNC;	Phenylacetyl-CoA ligase epaB OS=Aspergillus niger;	PF00501.28;PF13193.6	AMP-binding;AMP-binding_C	AMP-binding enzyme;AMP-binding enzyme C-terminal domain
gene-PDE_06069	PDE_06069	hypothetical protein	169.36	169.54	161.42	36.83	36.91	35.62	6.11	5.09	5.14	166.773	36.4533	5.44667	GO:0055085;GO:0016021;GO:0004497;GO:0071949	BP:transmembrane transport;CC:integral component of membrane;MF:monooxygenase activity;MF:FAD binding;	------	------	------	------	ENOG4111GK1	S:Function unknown	EPS31114.1	hypothetical protein PDE_06069 [Penicillium oxalicum 114-2]	sp|P86491|6HN3M_PSEFL;	6-hydroxynicotinate 3-monooxygenase OS=Pseudomonas fluorescens OX=294 PE=1 SV=1;	PF01494.19;PF01266.24;PF13450.6;PF07992.14;PF13454.6	FAD_binding_3;DAO;NAD_binding_8;Pyr_redox_2;NAD_binding_9	FAD binding domain;FAD dependent oxidoreductase;NA;Pyridine nucleotide-disulphide oxidoreductase;FAD-NA
gene-PDE_06091	PDE_06091	hypothetical protein	7.74	7.66	7.79	4	3.77	2.9	0.62	0.57	0.78	7.73	3.55667	0.656667	GO:0016021;GO:0016491	CC:integral component of membrane;MF:oxidoreductase activity;	------	------	------	------	ENOG410XNZY	S:Function unknown	EPS31136.1	hypothetical protein PDE_06091 [Penicillium oxalicum 114-2]	sp|Q12333|FRE7_YEAST;	Ferric/cupric reductase transmembrane component 7 OS=Saccharomyces cerevisiae;	PF01794.19;PF08022.12;PF08030.12	Ferric_reduct;FAD_binding_8;NAD_binding_6	Ferric reductase like transmembrane component;FAD-binding domain;Ferric reductase NAD binding domain
gene-PDE_06094	PDE_06094	hypothetical protein	13.19	13.28	12.77	1.79	1.74	1.53	0.05	0.01	0.07	13.08	1.68667	0.043333	GO:0016740;GO:0046872;GO:0016874;GO:0016747;GO:0004721	MF:transferase activity;MF:metal ion binding;MF:ligase activity;MF:transferase activity, transferring acyl groups other than amino-acyl groups;MF:phosphoprotein phosphatase activity;	------	------	------	------	------	------	EPS31139.1	hypothetical protein PDE_06094 [Penicillium oxalicum 114-2]	sp|Q4WYN6|CRMA_ASPFU;	Isocyanide synthase-NRPS hybrid crmA OS=Neosartorya fumigata;	PF05141.12;PF00501.28;PF02458.15;PF00550.25	DIT1_PvcA;AMP-binding;Transferase;PP-binding	Pyoverdine/dityrosine biosynthesis protein;AMP-binding enzyme;Transferase family;Phosphopantetheine attachment site
gene-PDE_06095	PDE_06095	hypothetical protein	28.32	26.74	28.19	5.36	4.12	3.12	0.37	0.13	0.12	27.75	4.2	0.206667	GO:0055085;GO:0016021	BP:transmembrane transport;CC:integral component of membrane;	------	------	------	------	ENOG410Y3SX;ENOG410XNQK;ENOG410YJHV	G:Carbohydrate transport and metabolism;	EPS31140.1	hypothetical protein PDE_06095 [Penicillium oxalicum 114-2]	sp|B6HJU0|ROQT_PENRW;	Efflux pump roqT OS=Penicillium rubens;	PF07690.16;PF06609.13	MFS_1;TRI12	Major Facilitator Superfamily;Fungal trichothecene efflux pump
gene-PDE_06096	PDE_06096	hypothetical protein	678.33	682.91	678.32	255.42	260.64	226.11	26.08	25.01	28.08	679.853	247.39	26.39	GO:0055085;GO:0016021	BP:transmembrane transport;CC:integral component of membrane;	------	------	------	------	ENOG410XRRJ	G:Carbohydrate transport and metabolism	EPS31141.1	hypothetical protein PDE_06096 [Penicillium oxalicum 114-2]	sp|Q4WYN4|CRMC_ASPFU;	Major facilitator coppper-regulated transporter crmC OS=Neosartorya fumigata;	PF07690.16	MFS_1	Major Facilitator Superfamily
gene-PDE_06098	PDE_06098	hypothetical protein	324.43	320.37	311.63	103.83	91.61	106.47	2.2	2.53	1.87	318.81	100.637	2.2	GO:0016021	CC:integral component of membrane;	------	------	------	------	------	------	EPS31143.1	hypothetical protein PDE_06098 [Penicillium oxalicum 114-2]	------	------	------	------	------
gene-PDE_06154	PDE_06154	hypothetical protein	83.22	83.56	85.87	13.17	15.94	10.75	0.43	0.25	0.32	84.2167	13.2867	0.333333	GO:0010333;GO:0000287	MF:terpene synthase activity;MF:magnesium ion binding;	------	------	------	------	ENOG4111BCH;ENOG410Y7HT	S:Function unknown;	EPS31199.1	hypothetical protein PDE_06154 [Penicillium oxalicum 114-2]	sp|Q6WP50|BOT2_BOTFU;	Presilphiperfolan-8-beta-ol synthase OS=Botryotinia fuckeliana OX=40559 GN=BOT2 PE=1 SV=1;	PF03936.16	Terpene_synth_C	Terpene synthase family, metal binding domain
gene-PDE_06199	PDE_06199	hypothetical protein	3.68	4.15	4.07	1.91	1.63	2.17	0.15	0.05	0.07	3.96667	1.90333	0.09	------	------	------	------	------	------	------	------	EPS31244.1	hypothetical protein PDE_06199 [Penicillium oxalicum 114-2]	------	------	------	------	------
gene-PDE_06515	PDE_06515	hypothetical protein	25.35	29.22	19.58	11.82	13.97	6.87	1.88	1.78	0.46	24.7167	10.8867	1.37333	------	------	------	------	------	------	------	------	EPS31560.1	hypothetical protein PDE_06515 [Penicillium oxalicum 114-2]	------	------	------	------	------
gene-PDE_06571	PDE_06571	hypothetical protein	2003.31	2024.45	1968.81	482.56	459.38	559.02	185.55	187.68	165.01	1998.86	500.32	179.413	GO:0046912;GO:0016846	MF:transferase activity, transferring acyl groups, acyl groups converted into alkyl on transfer;MF:carbon-sulfur lyase activity;	------	------	------	------	COG3791	S:Function unknown	EPS31616.1	hypothetical protein PDE_06571 [Penicillium oxalicum 114-2]	------	------	PF04828.14	GFA	Glutathione-dependent formaldehyde-activating enzyme
gene-PDE_06680	PDE_06680	hypothetical protein	162.8	163.57	159.07	44.02	46.67	36.16	6.99	7.83	7.79	161.813	42.2833	7.53667	GO:0006420;GO:0005737;GO:0016021;GO:0004814;GO:0016887;GO:0005524	BP:arginyl-tRNA aminoacylation;CC:cytoplasm;CC:integral component of membrane;MF:arginine-tRNA ligase activity;MF:ATPase activity;MF:ATP binding;	------	------	------	------	COG1131	J:Translation, ribosomal structure and biogenesis	EPS31723.1	hypothetical protein PDE_06680 [Penicillium oxalicum 114-2]	sp|Q8RXN0|AB11G_ARATH;	ABC transporter G family member 11 OS=Arabidopsis thaliana OX=3702 GN=ABCG11 PE=1 SV=1;	PF01061.24;PF00005.27;PF03193.16;PF13191.6;PF03215.15;PF13481.6	ABC2_membrane;ABC_tran;RsgA_GTPase;AAA_16;Rad17;AAA_25	ABC-2 type transporter;ABC transporter;RsgA GTPase;AAA ATPase domain;Rad17 P-loop domain;AAA domain
gene-PDE_06706	PDE_06706	hypothetical protein	430.97	413.15	403.51	147.83	153.62	135.48	8.59	8.08	8.61	415.877	145.643	8.42667	GO:0006979;GO:0009405;GO:0016853;GO:0020037;GO:0052878;GO:0016705;GO:0033751;GO:0005506;GO:0004601	BP:response to oxidative stress;BP:pathogenesis;MF:isomerase activity;MF:heme binding;MF:linoleate 8R-lipoxygenase activity;MF:oxidoreductase activity, acting on paired donors, with incorporation or reduction of molecular oxygen;MF:linoleate diol synthase activity;MF:iron ion binding;MF:peroxidase activity;	K17863	PPOA	map00591	Linoleic acid metabolism	ENOG410ZQ7D;ENOG410XPZ3	I:Lipid transport and metabolism;S:Function unknown	EPS31749.1	hypothetical protein PDE_06706 [Penicillium oxalicum 114-2]	sp|B0Y6R2|PPOA_ASPFC;	Psi-producing oxygenase A OS=Neosartorya fumigata;	PF03098.15;PF00067.22	An_peroxidase;p450	Animal haem peroxidase;Cytochrome P450
gene-PDE_06745	PDE_06745	hypothetical protein	82.04	77.7	74.08	16.4	15.18	14.84	5.3	4.2	5.06	77.94	15.4733	4.85333	GO:0050660;GO:0016614	MF:flavin adenine dinucleotide binding;MF:oxidoreductase activity, acting on CH-OH group of donors;	------	------	------	------	COG2303	O:Posttranslational modification, protein turnover, chaperones	EPS31787.1	hypothetical protein PDE_06745 [Penicillium oxalicum 114-2]	sp|A0A142PTM2|CITC_MONPU;	Dehydrogenase mpl7 OS=Monascus purpureus OX=5098 GN=mpl7 PE=1 SV=1;	PF00732.19;PF05199.13;PF05834.12	GMC_oxred_N;GMC_oxred_C;Lycopene_cycl	GMC oxidoreductase;GMC oxidoreductase;Lycopene cyclase protein
gene-PDE_06922	PDE_06922	hypothetical protein	77.99	82.14	77.13	7.28	5.7	5.51	0.58	0.41	0.65	79.0867	6.16333	0.546667	GO:0055085;GO:0016021;GO:0008168;GO:0003676;GO:0003723	BP:transmembrane transport;CC:integral component of membrane;MF:methyltransferase activity;MF:nucleic acid binding;MF:RNA binding;	------	------	------	------	------	------	EPS31963.1	hypothetical protein PDE_06922 [Penicillium oxalicum 114-2]	sp|Q9P6J7|YHD3_SCHPO;	Uncharacterized MFS-type transporter C1683.03c OS=Schizosaccharomyces pombe;	PF07690.16	MFS_1	Major Facilitator Superfamily
gene-PDE_07258	PDE_07258	hypothetical protein	32	30.08	30.19	5.22	3.66	4.08	0.78	0.3	0.16	30.7567	4.32	0.413333	------	------	------	------	------	------	ENOG410YDTE	S:Function unknown	EPS32298.1	hypothetical protein PDE_07258 [Penicillium oxalicum 114-2]	------	------	PF13668.6	Ferritin_2	Ferritin-like domain
gene-PDE_07497	PDE_07497	hypothetical protein	15.04	16.33	14.7	7.06	7.31	6.62	1.4	1.61	1.49	15.3567	6.99667	1.5	GO:0055085;GO:0016021	BP:transmembrane transport;CC:integral component of membrane;	------	------	------	------	COG0738	G:Carbohydrate transport and metabolism	EPS32537.1	hypothetical protein PDE_07497 [Penicillium oxalicum 114-2]	sp|Q08280|BSC6_YEAST;	Bypass of stop codon protein 6 OS=Saccharomyces cerevisiae;	PF07690.16	MFS_1	Major Facilitator Superfamily
gene-PDE_07704	PDE_07704	hypothetical protein	19.53	20.08	22.78	4.47	5.12	3.49	0.71	0.47	0.99	20.7967	4.36	0.723333	------	------	------	------	------	------	------	------	EPS32744.1	hypothetical protein PDE_07704 [Penicillium oxalicum 114-2]	------	------	------	------	------
gene-PDE_08014	PDE_08014	hypothetical protein	47.62	47.28	43.89	9.57	9.67	9.51	2.59	1.11	2.07	46.2633	9.58333	1.92333	GO:0016021	CC:integral component of membrane;	------	------	------	------	------	------	EPS33052.1	hypothetical protein PDE_08014 [Penicillium oxalicum 114-2]	------	------	PF11309.8	DUF3112	Protein of unknown function
gene-PDE_08046	PDE_08046	putative chitin synthase	60.04	56.47	54.93	2.43	2.12	1.17	0.74	0.68	0.51	57.1467	1.90667	0.643333	GO:0006031;GO:0016021;GO:0004100	BP:chitin biosynthetic process;CC:integral component of membrane;MF:chitin synthase activity;	K00698	CHS1	map00520	Amino sugar and nucleotide sugar metabolism	COG1215	M:Cell wall/membrane/envelope biogenesis	EPS33084.1	putative chitin synthase [Penicillium oxalicum 114-2]	sp|Q92197|CHSC_ASPFU;	Chitin synthase C OS=Neosartorya fumigata;	PF01644.17;PF08407.11;PF03142.15;PF13632.6	Chitin_synth_1;Chitin_synth_1N;Chitin_synth_2;Glyco_trans_2_3	Chitin synthase;Chitin synthase N-terminal;Chitin synthase;Glycosyl transferase family group 2
gene-PDE_08122	PDE_08122	putative chitinase	113.23	112.61	105.85	24.19	24.55	21.29	8.39	9.26	7.81	110.563	23.3433	8.48667	GO:0005975;GO:0008061;GO:0004553	BP:carbohydrate metabolic process;MF:chitin binding;MF:hydrolase activity, hydrolyzing O-glycosyl compounds;	K01183	E3.2.1.14	map00520	Amino sugar and nucleotide sugar metabolism	COG3325	G:Carbohydrate transport and metabolism	EPS33160.1	putative chitinase [Penicillium oxalicum 114-2]	sp|Q873X9|CHIB1_ASPFM;	Endochitinase B1 OS=Neosartorya fumigata OX=746128 GN=chiB1 PE=1 SV=1;	PF00704.28	Glyco_hydro_18	Glycosyl hydrolases family 18
gene-PDE_08157	PDE_08157	hypothetical protein	224.38	226.21	219.76	52.29	56.28	40.92	16.39	16.32	17.1	223.45	49.83	16.6033	GO:0016021	CC:integral component of membrane;	------	------	------	------	ENOG410ZY6J	S:Function unknown	EPS33195.1	hypothetical protein PDE_08157 [Penicillium oxalicum 114-2]	------	------	PF14518.6	Haem_oxygenas_2	Iron-containing redox enzyme
gene-PDE_08159	PDE_08159	hypothetical protein	472.65	490.78	481.1	32.81	32.17	29.9	9.51	9.97	5.24	481.51	31.6267	8.24	GO:0005506;GO:0016705;GO:0004497;GO:0020037	MF:iron ion binding;MF:oxidoreductase activity, acting on paired donors, with incorporation or reduction of molecular oxygen;MF:monooxygenase activity;MF:heme binding;	------	------	------	------	ENOG4110B0S;ENOG410YY7C	S:Function unknown;	EPS33197.1	hypothetical protein PDE_08159 [Penicillium oxalicum 114-2]	------	------	------	------	------
gene-PDE_08253	PDE_08253	hypothetical protein	82.89	85.62	84.15	12.8	14.46	10.76	2.5	2.24	2.1	84.22	12.6733	2.28	GO:0006351;GO:0005634;GO:0016021;GO:0003677;GO:0000981;GO:0008270	BP:transcription, DNA-templated;CC:nucleus;CC:integral component of membrane;MF:DNA binding;MF:RNA polymerase II transcription factor activity, sequence-specific DNA binding;MF:zinc ion binding;	------	------	------	------	ENOG4110BFF;ENOG4110BF7	S:Function unknown;	EPS33291.1	hypothetical protein PDE_08253 [Penicillium oxalicum 114-2]	------	------	PF00172.18;PF04082.18	Zn_clus;Fungal_trans	Fungal Z;Fungal specific transcription factor domain
gene-PDE_08397	PDE_08397	hypothetical protein	54.06	55.12	60.13	1.55	1.28	1.54	0.45	0.52	0.36	56.4367	1.45667	0.443333	------	------	------	------	------	------	ENOG4110AYZ	S:Function unknown	EPS33435.1	hypothetical protein PDE_08397 [Penicillium oxalicum 114-2]	------	------	------	------	------
gene-PDE_08645	PDE_08645	hypothetical protein	360.8	367.16	351.85	40.48	41.09	35.38	12.63	9.93	10.75	359.937	38.9833	11.1033	GO:0006855;GO:0055085;GO:0016021;GO:0005887;GO:0042910	BP:drug transmembrane transport;BP:transmembrane transport;CC:integral component of membrane;CC:integral component of plasma membrane;MF:xenobiotic transporter activity;	------	------	------	------	COG0477	S:Function unknown	EPS33683.1	hypothetical protein PDE_08645 [Penicillium oxalicum 114-2]	sp|A0A0B5EMG9|FUB11_FUSOX;	Efflux pump FUBT OS=Fusarium oxysporum OX=5507 GN=FUBT PE=1 SV=1;	PF07690.16;PF06609.13	MFS_1;TRI12	Major Facilitator Superfamily;Fungal trichothecene efflux pump
gene-PDE_08713	PDE_08713	hypothetical protein	62.33	63.72	60.05	23.68	26.07	23.69	8.24	8.13	11.19	62.0333	24.48	9.18667	GO:0015729;GO:0071423;GO:0071422;GO:0008272;GO:0006839;GO:0035435;GO:0015709;GO:0016021;GO:0031966;GO:0015297;GO:0005310;GO:0015141;GO:0015131;GO:0015116;GO:0015117;GO:0022857;GO:0015140	BP:oxaloacetate transport;BP:malate transmembrane transport;BP:succinate transmembrane transport;BP:sulfate transport;BP:mitochondrial transport;BP:phosphate ion transmembrane transport;BP:thiosulfate transport;CC:integral component of membrane;CC:mitochondrial membrane;MF:antiporter activity;MF:dicarboxylic acid transmembrane transporter activity;MF:succinate transmembrane transporter activity;M…	K13577	SLC25A10, DIC	------	------	ENOG410XQHU	S:Function unknown	EPS33751.1	hypothetical protein PDE_08713 [Penicillium oxalicum 114-2]	sp|Q6FTN2|DIC1_CANGA;	Mitochondrial dicarboxylate transporter OS=Candida glabrata;	PF00153.27	Mito_carr	Mitochondrial carrier protein
gene-PDE_08743	PDE_08743	hypothetical protein	390.47	413.35	379.48	35.57	36.64	41.18	7.11	6.76	7.42	394.433	37.7967	7.09667	GO:0016021;GO:0048037	CC:integral component of membrane;MF:cofactor binding;	K07005	K07005	------	------	COG3467	S:Function unknown	EPS33781.1	hypothetical protein PDE_08743 [Penicillium oxalicum 114-2]	------	------	PF12900.7	Pyridox_ox_2	Pyridoxamine 5'-phosphate oxidase
gene-PDE_08892	PDE_08892	hypothetical protein	100.78	110.25	104.53	6.49	8.31	7.79	0.47	0.88	1.01	105.187	7.53	0.786667	GO:0015996;GO:0016787;GO:0047746;GO:0016491	BP:chlorophyll catabolic process;MF:hydrolase activity;MF:chlorophyllase activity;MF:oxidoreductase activity;	------	------	------	------	COG4188	S:Function unknown	EPS33930.1	hypothetical protein PDE_08892 [Penicillium oxalicum 114-2]	------	------	PF12740.7;PF03403.13;PF12697.7;PF07224.11	Chlorophyllase2;PAF-AH_p_II;Abhydrolase_6;Chlorophyllase	Chlorophyllase enzyme;Platelet-activating factor acetylhydrolase, isoform II;Alpha/beta hydrolase family;Chlorophyllase
gene-PDE_08920	PDE_08920	hypothetical protein	498.23	504.63	522.59	161.36	163.37	132.36	4.98	8.25	4.35	508.483	152.363	5.86	GO:0004198	MF:calcium-dependent cysteine-type endopeptidase activity;	------	------	------	------	ENOG410XP0B	O:Posttranslational modification, protein turnover, chaperones	EPS33958.1	hypothetical protein PDE_08920 [Penicillium oxalicum 114-2]	sp|O35920|CAN9_RAT;	Calpain-9 OS=Rattus norvegicus OX=10116 GN=Capn9 PE=2 SV=2;	PF00648.21	Peptidase_C2	Calpain family cysteine protease
gene-PDE_09098	PDE_09098	hypothetical protein	498.88	496.22	497.45	128.1	115.47	122.7	6.15	4.99	2.97	497.517	122.09	4.70333	------	------	------	------	------	------	------	------	EPS34136.1	hypothetical protein PDE_09098 [Penicillium oxalicum 114-2]	------	------	------	------	------
gene-PDE_09099	PDE_09099	hypothetical protein	37.55	37.91	36.44	6.72	8.68	6.78	1.05	0.73	0.71	37.3	7.39333	0.83	GO:0032366;GO:0055085;GO:0016021;GO:0005623;GO:0016301	BP:intracellular sterol transport;BP:transmembrane transport;CC:integral component of membrane;CC:cell;MF:kinase activity;	------	------	------	------	ENOG410YFVE	S:Function unknown	EPS34137.1	hypothetical protein PDE_09099 [Penicillium oxalicum 114-2]	------	------	PF01636.23;PF01633.20	APH;Choline_kinase	Phosphotransferase enzyme family;Choline/ethanolamine kinase
gene-PDE_09101	PDE_09101	hypothetical protein	196.57	209.04	198.38	91.75	87.83	92.1	15.13	15.33	15.38	201.33	90.56	15.28	GO:0016021	CC:integral component of membrane;	------	------	------	------	------	------	EPS34139.1	hypothetical protein PDE_09101 [Penicillium oxalicum 114-2]	------	------	------	------	------
gene-PDE_09243	PDE_09243	hypothetical protein	211.29	197.7	201.94	2.52	2.2	2.47	0.62	0.29	0.21	203.643	2.39667	0.373333	GO:0045122;GO:0006355;GO:0005634;GO:0008270;GO:0003677;GO:0000981	BP:aflatoxin biosynthetic process;BP:regulation of transcription, DNA-templated;CC:nucleus;MF:zinc ion binding;MF:DNA binding;MF:RNA polymerase II transcription factor activity, sequence-specific DNA binding;	------	------	------	------	ENOG410YVWZ;ENOG410Y3BB	S:Function unknown;	EPS34279.1	hypothetical protein PDE_09243 [Penicillium oxalicum 114-2]	sp|Q5BH32|MDPE_EMENI;	Monodictyphenone cluster transcription factor OS=Emericella nidulans;	PF08493.10;PF00172.18	AflR;Zn_clus	Aflatoxin regulatory protein;Fungal Z
gene-PDE_09244	PDE_09244	hypothetical protein	282.96	285.47	271.76	5.36	5.44	4.27	0.48	0.89	0.49	280.063	5.02333	0.62	GO:0003677	MF:DNA binding;	------	------	------	------	ENOG410YC9U	S:Function unknown	EPS34280.1	hypothetical protein PDE_09244 [Penicillium oxalicum 114-2]	sp|C8VQ72|MDPA_EMENI;	Monodictyphenone cluster transcriptional coactivator mdpA OS=Emericella nidulans;	------	------	------
gene-PDE_09247	PDE_09247	hypothetical protein	8.28	7.97	8.2	1.76	2.18	1.27	1.28	0.6	0.37	8.15	1.73667	0.75	------	------	------	------	------	------	------	------	EPS34283.1	hypothetical protein PDE_09247 [Penicillium oxalicum 114-2]	------	------	------	------	------
gene-PDE_09301	PDE_09301	hypothetical protein	1646.6	1639.23	1759.95	802.3	850.83	549.44	234.63	224.17	271.12	1681.93	734.19	243.307	GO:0009448;GO:0030170;GO:0003867	BP:gamma-aminobutyric acid metabolic process;MF:pyridoxal phosphate binding;MF:4-aminobutyrate transaminase activity;	K13524	ABAT	map00280;map00250;map00640;map00410;map00650	Valine, leucine and isoleucine degradation;Alanine, aspartate and glutamate metabolism;Propanoate metabolism;beta-Alanine metabolism;Butanoate metabolism	COG0160	E:Amino acid transport and metabolism	EPS34337.1	hypothetical protein PDE_09301 [Penicillium oxalicum 114-2]	sp|P14010|GABAT_EMENI;	4-aminobutyrate aminotransferase OS=Emericella nidulans;	PF00202.21	Aminotran_3	Aminotransferase class-III
gene-PDE_09427	PDE_09427	hypothetical protein	5.82	4.91	3.74	1.05	1.02	1.32	0.19	0.17	0.21	4.82333	1.13	0.19	------	------	------	------	------	------	ENOG410XQ3J	S:Function unknown	EPS34463.1	hypothetical protein PDE_09427 [Penicillium oxalicum 114-2]	------	------	PF07719.17;PF00515.28	TPR_2;TPR_1	Tetratricopeptide repeat;Tetratricopeptide repeat
gene-PDE_09445	PDE_09445	hypothetical protein	4.39	4.85	6.43	1.93	2.53	1.85	3.72	1.78	0.51	5.22333	2.10333	2.00333	------	------	------	------	------	------	------	------	EPS34481.1	hypothetical protein PDE_09445 [Penicillium oxalicum 114-2]	------	------	------	------	------
gene-PDE_09452	PDE_09452	hypothetical protein	215.48	212.32	214.68	1.08	0.38	0.19	0	0	0	214.16	0.55	0	GO:0016787	MF:hydrolase activity;	------	------	------	------	ENOG410Y97B	S:Function unknown	EPS34488.1	hypothetical protein PDE_09452 [Penicillium oxalicum 114-2]	sp|Q4WZB3|AYG1_ASPFU;	Heptaketide hydrolyase ayg1 OS=Neosartorya fumigata;	PF06500.11;PF02129.18;PF00326.21;PF00756.20	DUF1100;Peptidase_S15;Peptidase_S9;Esterase	Alpha/beta hydrolase of unknown function;X-Pro dipeptidyl-peptidase;Prolyl oligopeptidase family;Putative esterase
gene-PDE_09472	PDE_09472	hypothetical protein	6.74	6.43	6.64	3.12	2.8	2.73	0.85	0.79	0.66	6.60333	2.88333	0.766667	------	------	------	------	------	------	------	------	EPS34508.1	hypothetical protein PDE_09472 [Penicillium oxalicum 114-2]	------	------	------	------	------
gene-PDE_09568	PDE_09568	hypothetical protein	42.38	44.74	43.47	1.68	1.56	1.02	0.56	0.4	0.61	43.53	1.42	0.523333	GO:0016021	CC:integral component of membrane;	------	------	------	------	ENOG4111QY4	S:Function unknown	EPS34604.1	hypothetical protein PDE_09568 [Penicillium oxalicum 114-2]	------	------	PF13886.6	DUF4203	Domain of unknown function
gene-PDE_09571	PDE_09571	hypothetical protein	278.07	289.83	269.74	53.97	66.59	53.61	17.87	16.96	13.49	279.213	58.0567	16.1067	GO:0006396;GO:0004525	BP:RNA processing;MF:ribonuclease III activity;	K03685	rnc, DROSHA, RNT1	map03008	Ribosome biogenesis in eukaryotes	ENOG410YT29;ENOG4110B31	S:Function unknown;	EPS34607.1	hypothetical protein PDE_09571 [Penicillium oxalicum 114-2]	sp|Q5R106|RNC_IDILO;	Ribonuclease 3 OS=Idiomarina loihiensis;	PF14622.6;PF00636.26	Ribonucleas_3_3;Ribonuclease_3	Ribonuclease-III-like;Ribonuclease III domain
gene-PDE_09616	PDE_09616	hypothetical protein	644.39	651.87	626.04	64.53	61.81	62.51	0	0	0	640.767	62.95	0	GO:0008270;GO:0016491	MF:zinc ion binding;MF:oxidoreductase activity;	K18369	adh2	map00640	Propanoate metabolism	COG1063	S:Function unknown	EPS34652.1	hypothetical protein PDE_09616 [Penicillium oxalicum 114-2]	sp|Q0KDL6|ADH_CUPNH;	Alcohol dehydrogenase OS=Cupriavidus necator;	PF08240.12;PF00107.26;PF16912.5;PF13602.6	ADH_N;ADH_zinc_N;Glu_dehyd_C;ADH_zinc_N_2	Alcohol dehydrogenase GroES-like domain;Zinc-binding dehydrogenase;Glucose dehydrogenase C-terminus;Zinc-binding dehydrogenase
gene-PDE_09617	PDE_09617	hypothetical protein	125.95	131.14	128.5	24.43	24.03	30.11	24.24	24.1	24.96	128.53	26.19	24.4333	GO:0005739;GO:0052856;GO:0046872;GO:0000166	CC:mitochondrion;MF:NADHX epimerase activity;MF:metal ion binding;MF:nucleotide binding;	K17759	AIBP, nnrE	------	------	COG0062	S:Function unknown	EPS34653.1	hypothetical protein PDE_09617 [Penicillium oxalicum 114-2]	sp|Q4WUG4|NNRE_ASPFU;	NA;	PF03853.15	YjeF_N	YjeF-related protein N-terminus
gene-PDE_09699	PDE_09699	hypothetical protein	241	227.85	232.53	13.2	13.01	11.83	1.71	1.34	1.45	233.793	12.68	1.5	GO:0016021;GO:0016491	CC:integral component of membrane;MF:oxidoreductase activity;	------	------	------	------	ENOG410XNZY;ENOG41117V5;ENOG410Y261	S:Function unknown;	EPS34735.1	hypothetical protein PDE_09699 [Penicillium oxalicum 114-2]	------	------	------	------	------
gene-PDE_09745	PDE_09745	hypothetical protein	14.39	11.98	14.66	2.2	2.34	3.74	0.49	0.72	0.58	13.6767	2.76	0.596667	------	------	------	------	------	------	COG1028	Q:Secondary metabolites biosynthesis, transport and catabolism	EPS34781.1	hypothetical protein PDE_09745 [Penicillium oxalicum 114-2]	sp|C8V3Y7|ATND_EMENI;	Short chain dehydrogenase atnD OS=Emericella nidulans;	PF00106.25;PF08659.10;PF13561.6	adh_short;KR;adh_short_C2	short chain dehydrogenase;KR domain;Enoyl
gene-PDE_09758	PDE_09758	hypothetical protein	337.18	331.23	316.05	95.93	101.61	92.04	18.09	17.43	20.84	328.153	96.5267	18.7867	GO:0016021;GO:0004497;GO:0071949	CC:integral component of membrane;MF:monooxygenase activity;MF:FAD binding;	------	------	------	------	COG0654	U:Intracellular trafficking, secretion, and vesicular transport	EPS34794.1	hypothetical protein PDE_09758 [Penicillium oxalicum 114-2]	sp|Q6SSJ6|MOBA_COMTE;	3-hydroxybenzoate 4-monooxygenase OS=Comamonas testosteroni OX=285 GN=mobA PE=1 SV=1;	PF01494.19;PF07976.12	FAD_binding_3;Phe_hydrox_dim	FAD binding domain;Phenol hydroxylase, C-terminal dimerisation domain
gene-PDE_09759	PDE_09759	hypothetical protein	357.53	340.09	337.49	136.89	133.47	127.57	18.51	17.98	24.68	345.037	132.643	20.39	GO:0019878;GO:0006571;GO:0009058;GO:0009074;GO:0009094;GO:1901605;GO:0009073;GO:0008483;GO:0008793;GO:0047536;GO:0003824;GO:0016740;GO:0030170	BP:lysine biosynthetic process via aminoadipic acid;BP:tyrosine biosynthetic process;BP:biosynthetic process;BP:aromatic amino acid family catabolic process;BP:L-phenylalanine biosynthetic process;BP:alpha-amino acid metabolic process;BP:aromatic amino acid family biosynthetic process;MF:transaminase activity;MF:aromatic-amino-aci;MF:2-aminoadipate transaminase activity;MF:catalytic activity;MF:t…	K00838	ARO8	map00300;map00270;map00130;map00360;map00350;map00400;map00380	Lysine biosynthesis;Cysteine and methionine metabolism;Ubiquinone and other terpenoid-quinone biosynthesis;Phenylalanine metabolism;Tyrosine metabolism;Phenylalanine, tyrosine and tryptophan biosynthesis;Tryptophan metabolism	COG1167	K:Transcription	EPS34795.1	hypothetical protein PDE_09759 [Penicillium oxalicum 114-2]	sp|O14192|AATR1_SCHPO;	Aromatic amino acid aminotransferase C56E4.03 OS=Schizosaccharomyces pombe;	PF00155.21;PF12897.7	Aminotran_1_2;Aminotran_MocR	Aminotransferase class I and II;Alanine-glyoxylate amino-transferase
gene-PDE_09760	PDE_09760	hypothetical protein	619.63	639.73	633.02	237.15	217.12	236.36	68.81	71.49	86.33	630.793	230.21	75.5433	GO:0051213	MF:dioxygenase activity;	K10253	K10253	------	------	COG3805	Q:Secondary metabolites biosynthesis, transport and catabolism	EPS34796.1	hypothetical protein PDE_09760 [Penicillium oxalicum 114-2]	sp|P56739|Y212_BOTFU;	Uncharacterized 21.2 kDa protein OS=Botryotinia fuckeliana OX=40559 PE=2 SV=1;	PF08883.11	DOPA_dioxygen	Dopa 4,5-dioxygenase family
gene-PDE_09761	PDE_09761	hypothetical protein	1846.22	1844.32	1850.74	448.46	422.53	450.98	29.21	30.02	37.75	1847.09	440.657	32.3267	GO:0009072;GO:0003868;GO:0046872	BP:aromatic amino acid family metabolic process;MF:4-hydroxyphenylpyruvate dioxygenase activity;MF:metal ion binding;	K00457	HPD, hppD	map00130;map00360;map00350	Ubiquinone and other terpenoid-quinone biosynthesis;Phenylalanine metabolism;Tyrosine metabolism	COG3185	Q:Secondary metabolites biosynthesis, transport and catabolism	EPS34797.1	hypothetical protein PDE_09761 [Penicillium oxalicum 114-2]	sp|Q4WPV8|HPPD2_ASPFU;	Probable 4-hydroxyphenylpyruvate dioxygenase 2 OS=Neosartorya fumigata;	PF00903.25;PF13669.6;PF14696.6	Glyoxalase;Glyoxalase_4;Glyoxalase_5	Glyoxalase/Bleomycin resistance protein/Dioxygenase superfamily;Glyoxalase/Bleomycin resistance protein/Dioxygenase superfamily;Hydroxyphenylpyruvate dioxygenase, HPPD, N-terminal
gene-PDE_09764	PDE_09764	hypothetical protein	407.66	425.7	408.55	166.23	165.75	150.44	22.15	24.28	26.24	413.97	160.807	24.2233	GO:0055085;GO:0016021	BP:transmembrane transport;CC:integral component of membrane;	------	------	------	------	ENOG410XNQK	C:Energy production and conversion	EPS34800.1	hypothetical protein PDE_09764 [Penicillium oxalicum 114-2]	sp|G4N2A8|MFS1_MAGO7;	MFS-type transporter 1 OS=Magnaporthe oryzae;	PF07690.16	MFS_1	Major Facilitator Superfamily
gene-PDE_09771	PDE_09771	hypothetical protein	51.21	56.39	49.85	3.6	2.9	3.32	0	0	0	52.4833	3.27333	0	GO:0016021	CC:integral component of membrane;	------	------	------	------	ENOG411240W	S:Function unknown	EPS34807.1	hypothetical protein PDE_09771 [Penicillium oxalicum 114-2]	------	------	PF01284.23	MARVEL	Membrane-associating domain
gene-PDE_09932	PDE_09932	hypothetical protein	23.05	19.92	19.34	0.91	1.26	1.44	0.23	0.55	0.47	20.77	1.20333	0.416667	GO:0016021	CC:integral component of membrane;	------	------	------	------	------	------	EPS34967.1	hypothetical protein PDE_09932 [Penicillium oxalicum 114-2]	------	------	------	------	------
gene-PDE_09959	PDE_09959	hypothetical protein	718.61	590.46	588.84	178.15	162.07	184.63	38.55	48.53	31.29	632.637	174.95	39.4567	GO:0016021	CC:integral component of membrane;	------	------	------	------	ENOG410Z5EB;ENOG410Y7KV	S:Function unknown;	EPS34994.1	hypothetical protein PDE_09959 [Penicillium oxalicum 114-2]	------	------	------	------	------
gene-PDE_10004	PDE_10004	hypothetical protein	98.27	109.54	103.99	12.8	12.56	9.15	0.57	0.53	0.58	103.933	11.5033	0.56	GO:0016021;GO:0005506;GO:0016705;GO:0004497;GO:0020037	CC:integral component of membrane;MF:iron ion binding;MF:oxidoreductase activity, acting on paired donors, with incorporation or reduction of molecular oxygen;MF:monooxygenase activity;MF:heme binding;	------	------	------	------	COG2124;ENOG410YHB5;ENOG4111A67	S:Function unknown;O:Posttranslational modification, protein turnover, chaperones;S:Function unknown	EPS35039.1	hypothetical protein PDE_10004 [Penicillium oxalicum 114-2]	sp|B8NU02|LNAD_ASPFN;	Cytochrome P450 monooxygenase lnaD OS=Aspergillus flavus;	PF00067.22	p450	Cytochrome P450
gene-PDE_10005	PDE_10005	hypothetical protein	273.31	272.44	269.47	1.8	1.42	1.06	0	0.18	0.16	271.74	1.42667	0.113333	GO:0016021;GO:0016765	CC:integral component of membrane;MF:transferase activity, transferring alkyl or ary;	------	------	------	------	COG0382	S:Function unknown	EPS35040.1	hypothetical protein PDE_10005 [Penicillium oxalicum 114-2]	sp|Q4WLD0|PYR6_ASPFU;	Polyprenyl transferase pyr6 OS=Neosartorya fumigata;	PF01040.18	UbiA	UbiA prenyltransferase family
