# Supplementary material for: Constructing a novel expression system by specific activation of amylase expression pathway in Penicillium
Source: Microb Cell Fact. 2020 Jul 29;19:155. doi: 10.1186/s12934-020-01410-4 (PMC7391575; doi:10.1186/s12934-020-01410-4)
Supplement: Supplementary file 8 — Additional file 8: Table S8. List of 40 putative transcription factors genes determined in this study that response to overexpression of AmyR and deletion of CreA. [file 12934_2020_1410_MOESM8_ESM.xls]

## Sheet: SHEET1
Cluster	Gene_id	Gene_name	Gene_description	Δ13A_1	Δ13A_2	Δ13A_3	Δ13A-OamyR _1	Δ13A-OamyR _2	Δ13A-OamyR _3	Δ13A-OamyR-ΔCreA_1	Δ13A-OamyR-ΔCreA_2	Δ13A-OamyR-ΔCreA_3	Δ13A	Δ13A-OamyR	Δ13A-OamyR-ΔCreA	GO_id	GO_term	KO_id	KO_name	Pathway_id	Pathway_definition	COG_id	COG_Functional Categories	NR_hit-name	NR_description	Swiss-Prot_hit-name	Swiss-Prot_description	Pfam_id	Domain	Domain description
C1	gene-PDE_09227	PDE_09227	hypothetical protein	122.47	124.77	123.22	10.19	12.2	10.47	10.26	10.88	13.87	123.487	10.9533	11.67	GO:0006351;GO:0005634;GO:0008270;GO:0000981;GO:0003677	BP:transcription, DNA-templated;CC:nucleus;MF:zinc ion binding;MF:RNA polymerase II transcription factor activity, sequence-specific DNA binding;MF:DNA binding;	------	------	------	------	ENOG410YB3H;ENOG4110BCU	S:Function unknown;K:Transcription	EPS34263.1	hypothetical protein PDE_09227 [Penicillium oxalicum 114-2]	sp|I1RF57|AURR2_GIBZE;	Aurofusarin cluster transcription factor aurR2 OS=Gibberella zeae;	PF04082.18	Fungal_trans	Fungal specific transcription factor domain
	gene-PDE_09243	PDE_09243	hypothetical protein	211.29	197.7	201.94	2.52	2.2	2.47	0.62	0.29	0.21	203.643	2.39667	0.373333	GO:0045122;GO:0006355;GO:0005634;GO:0008270;GO:0003677;GO:0000981	BP:aflatoxin biosynthetic process;BP:regulation of transcription, DNA-templated;CC:nucleus;MF:zinc ion binding;MF:DNA binding;MF:RNA polymerase II transcription factor activity, sequence-specific DNA binding;	------	------	------	------	ENOG410YVWZ;ENOG410Y3BB	S:Function unknown;	EPS34279.1	hypothetical protein PDE_09243 [Penicillium oxalicum 114-2]	sp|Q5BH32|MDPE_EMENI;	Monodictyphenone cluster transcription factor OS=Emericella nidulans;	PF08493.10;PF00172.18	AflR;Zn_clus	Aflatoxin regulatory protein;Fungal Z
	gene-PDE_00588	PDE_00588	hypothetical protein	22.76	22.37	20.69	4.07	4.71	2.83	6.04	7.17	7.84	21.94	3.87	7.01667	GO:0005634;GO:0003700;GO:0008270;GO:0003676	CC:nucleus;MF:transcription factor activity, sequence-specific DNA binding;MF:zinc ion binding;MF:nucleic acid binding;	K12236	NFX1	------	------	ENOG410XR02	K:Transcription	EPS25654.1	hypothetical protein PDE_00588 [Penicillium oxalicum 114-2]	sp|O74853|FAP1H_SCHPO;	FKBP12-associated protein 1 homolog OS=Schizosaccharomyces pombe;	PF01424.22;PF01422.17	R3H;zf-NF-X1	R3H domain;NF-X1 type zinc finger
	gene-PDE_06349	PDE_06349	hypothetical protein	6.2	5.87	5.28	1.85	2.14	1.54	2.66	2.34	2.89	5.78333	1.84333	2.63	GO:0005634;GO:0003700;GO:0046872;GO:0008270	CC:nucleus;MF:transcription factor activity, sequence-specific DNA binding;MF:metal ion binding;MF:zinc ion binding;	------	------	------	------	COG1112	S:Function unknown	EPS31394.1	hypothetical protein PDE_06349 [Penicillium oxalicum 114-2]	sp|Q9P2E3|ZNFX1_HUMAN;	NFX1-type zinc finger-containing protein 1 OS=Homo sapiens OX=9606 GN=ZNFX1 PE=2 SV=2;	PF13087.6;PF13086.6;PF13245.6;PF09848.9;PF18044.1;PF00642.24;PF18345.1;PF16131.5	AAA_12;AAA_11;AAA_19;DUF2075;zf-CCCH_4;zf-CCCH;zf_CCCH_4;Torus	AAA domain;AAA domain;AAA domain;Uncharacterized conserved protein;CCCH-type zinc finger;Zinc finger C-x8-C-x5-C-x3-H type;Zinc finger domain;Torus domain
	gene-PDE_09356	PDE_09356	hypothetical protein	39.25	38.87	36.8	12.54	12.18	13.41	10.83	8.4	10.94	38.3067	12.71	10.0567	GO:0003676	MF:nucleic acid binding;	------	------	------	------	ENOG4111TX5	S:Function unknown	EPS34392.1	hypothetical protein PDE_09356 [Penicillium oxalicum 114-2]	sp|Q6P0X2|ZN511_MOUSE;	Zinc finger protein 511 OS=Mus musculus OX=10090 GN=Znf511 PE=1 SV=2;	------	------	------
	gene-PDE_05166	PDE_05166	hypothetical protein	43.31	44.56	41.45	23.87	23.4	16.54	25.85	26.68	32.28	43.1067	21.27	28.27	GO:0006351;GO:0005634;GO:0016021;GO:0003677;GO:0000981;GO:0008270	BP:transcription, DNA-templated;CC:nucleus;CC:integral component of membrane;MF:DNA binding;MF:RNA polymerase II transcription factor activity, sequence-specific DNA binding;MF:zinc ion binding;	------	------	------	------	ENOG410XNXY	K:Transcription	EPS30216.1	hypothetical protein PDE_05166 [Penicillium oxalicum 114-2]	sp|P40467|ASG1_YEAST;	Activator of stress genes 1 OS=Saccharomyces cerevisiae;	PF04082.18;PF00172.18	Fungal_trans;Zn_clus	Fungal specific transcription factor domain;Fungal Z
	gene-PDE_03970	PDE_03970	hypothetical protein	18.67	16.6	17.28	9.85	7.58	6.94	6.2	5.62	7.05	17.5167	8.12333	6.29	GO:0006355;GO:0005634;GO:0008233;GO:0003677	BP:regulation of transcription, DNA-templated;CC:nucleus;MF:peptidase activity;MF:DNA binding;	------	------	------	------	ENOG410XPMQ	K:Transcription	EPS29024.1	hypothetical protein PDE_03970 [Penicillium oxalicum 114-2]	sp|Q5U4X3|MEI3A_XENLA;	Homeobox protein meis3-A OS=Xenopus laevis OX=8355 GN=meis3-a PE=2 SV=1;	PF05920.11;PF00046.29	Homeobox_KN;Homeodomain	Homeobox KN domain;Homeodomain
	gene-PDE_06888	PDE_06888	hypothetical protein	4.41	6.97	6.33	0.19	0	0.14	0	0.33	0	5.90333	0.11	0.11	GO:0006351;GO:0005634;GO:0008270;GO:0000981;GO:0003677	BP:transcription, DNA-templated;CC:nucleus;MF:zinc ion binding;MF:RNA polymerase II transcription factor activity, sequence-specific DNA binding;MF:DNA binding;	------	------	------	------	ENOG410Y9VK;ENOG410YKGT	S:Function unknown;	EPS31929.1	hypothetical protein PDE_06888 [Penicillium oxalicum 114-2]	sp|B8NJG9|LEPE_ASPFN;	Transcription factor lepE OS=Aspergillus flavus;	PF04082.18;PF00172.18	Fungal_trans;Zn_clus	Fungal specific transcription factor domain;Fungal Z
	gene-PDE_03008	PDE_03008	hypothetical protein	170.62	171.22	172.18	44.67	45.64	34.84	5.38	8.46	7.28	171.34	41.7167	7.04	GO:0005634;GO:0003677	CC:nucleus;MF:DNA binding;	K09425	K09425	------	------	COG5147	O:Posttranslational modification, protein turnover, chaperones	EPS28062.1	hypothetical protein PDE_03008 [Penicillium oxalicum 114-2]	sp|O13493|MYB1_NEUCR;	Myb-like DNA-binding protein myb-1 OS=Neurospora crassa;	PF00249.31;PF13921.6	Myb_DNA-binding;Myb_DNA-bind_6	Myb-like DNA-binding domain;Myb-like DNA-binding domain
	gene-PDE_07588	PDE_07588	hypothetical protein	21.72	19.67	19.23	8.87	10.43	7.8	6.97	7.66	9.03	20.2067	9.03333	7.88667	GO:0005634;GO:0016021;GO:0003700;GO:0043565;GO:0008270	CC:nucleus;CC:integral component of membrane;MF:transcription factor activity, sequence-specific DNA binding;MF:sequence-specific DNA binding;MF:zinc ion binding;	------	------	------	------	COG5641	S:Function unknown	EPS32628.1	hypothetical protein PDE_07588 [Penicillium oxalicum 114-2]	sp|Q92259|SREP_PENCH;	GATA factor SREP OS=Penicillium chrysogenum OX=5076 GN=SREP PE=4 SV=1;	PF00320.27;PF08271.12	GATA;TF_Zn_Ribbon	GATA zinc finger;TFIIB zinc-binding
	gene-PDE_05545	PDE_05545	hypothetical protein	10.26	12.99	11.27	3.98	4.48	4.33	2.5	1.79	2.26	11.5067	4.26333	2.18333	GO:0003700	MF:transcription factor activity, sequence-specific DNA binding;	------	------	------	------	ENOG410YGR8	S:Function unknown	EPS30593.1	hypothetical protein PDE_05545 [Penicillium oxalicum 114-2]	------	------	------	------	------
	gene-PDE_00531	PDE_00531	hypothetical protein	7.48	11.08	7.69	3.76	3.79	3.8	0.8	0.56	0.54	8.75	3.78333	0.633333	GO:0005634;GO:0008270;GO:0000981	CC:nucleus;MF:zinc ion binding;MF:RNA polymerase II transcription factor activity, sequence-specific DNA binding;	------	------	------	------	ENOG4111A4Z	K:Transcription	EPS25597.1	hypothetical protein PDE_00531 [Penicillium oxalicum 114-2]	sp|O93870|FCR1_CANAX;	Fluconazole resistance protein 1 OS=Candida albicans OX=5476 GN=FCR1 PE=4 SV=1;	PF00172.18	Zn_clus	Fungal Z
	gene-PDE_06213	PDE_06213	hypothetical protein	63.38	65.89	63.71	31.52	29.79	28.88	46.35	48.53	46.33	64.3267	30.0633	47.07	GO:0006284;GO:0006351;GO:0005634;GO:0005739;GO:0003677;GO:0004844;GO:0008270	BP:base-excision repair;BP:transcription, DNA-templated;CC:nucleus;CC:mitochondrion;MF:DNA binding;MF:uracil DNA N-glycosylase activity;MF:zinc ion binding;	------	------	------	------	ENOG4111SK9	S:Function unknown	EPS31258.1	hypothetical protein PDE_06213 [Penicillium oxalicum 114-2]	------	------	PF04082.18	Fungal_trans	Fungal specific transcription factor domain
	gene-PDE_04009	PDE_04009	hypothetical protein	9.38	8.34	8	2.86	2.35	2.4	5.63	5.11	5.32	8.57333	2.53667	5.35333	GO:0005634;GO:0008270;GO:0000981;GO:0003677	CC:nucleus;MF:zinc ion binding;MF:RNA polymerase II transcription factor activity, sequence-specific DNA binding;MF:DNA binding;	------	------	------	------	ENOG410YCZ6	S:Function unknown	EPS29062.1	hypothetical protein PDE_04009 [Penicillium oxalicum 114-2]	sp|A1CLY6|CCSR_ASPCL;	Cytochalasin cluster regulator ccsR OS=Aspergillus clavatus;	PF00172.18	Zn_clus	Fungal Z
C2	gene-PDE_06843	PDE_06843	hypothetical protein	57.68	57.12	56.4	154.61	159.63	128.4	91.23	93.09	106.33	57.0667	147.547	96.8833	GO:0005634;GO:0016407;GO:0008270;GO:0000981	CC:nucleus;MF:acetyltransferase activity;MF:zinc ion binding;MF:RNA polymerase II transcription factor activity, sequence-specific DNA binding;	------	------	------	------	COG0110	S:Function unknown	EPS31885.1	hypothetical protein PDE_06843 [Penicillium oxalicum 114-2]	sp|P37515|MAA_BACSU;	Probable maltose O-acetyltransferase OS=Bacillus subtilis;	PF16628.5;PF12464.8;PF14602.6;PF00172.18;PF00132.24	Mac_assoc;Mac;Hexapep_2;Zn_clus;Hexapep	Unstructured region on maltose acetyltransferase;Maltose acetyltransferase;Hexapeptide repeat of succinyl-transferase;Fungal Z;Bacterial transferase hexapeptide
	gene-PDE_02807	PDE_02807	hypothetical protein	79.12	81.7	80.19	157.76	183.91	154.04	206.13	207.57	228.61	80.3367	165.237	214.103	GO:0005634;GO:0008270;GO:0000981	CC:nucleus;MF:zinc ion binding;MF:RNA polymerase II transcription factor activity, sequence-specific DNA binding;	------	------	------	------	ENOG410YAYA	S:Function unknown	EPS27863.1	hypothetical protein PDE_02807 [Penicillium oxalicum 114-2]	------	------	------	------	------
C3	gene-PDE_07094	PDE_07094	hypothetical protein	25.73	15.99	43.67	29.2	51.2	53.01	34.78	26.64	23.61	28.4633	44.47	28.3433	GO:0003676;GO:0003677	MF:nucleic acid binding;MF:DNA binding;	------	------	------	------	COG5048	S:Function unknown	EPS32135.1	hypothetical protein PDE_07094 [Penicillium oxalicum 114-2]	sp|A4FV57|AEBP2_BOVIN;	Zinc finger protein AEBP2 OS=Bos taurus OX=9913 GN=AEBP2 PE=2 SV=2;	PF00096.26;PF13465.6;PF12171.8;PF12874.7;PF13894.6	zf-C2H2;zf-H2C2_2;zf-C2H2_jaz;zf-met;zf-C2H2_4	Zinc finger, C2H2 type;Zinc-finger double domain;Zinc-finger double-stranded RNA-binding;Zinc-finger of C2H2 type;C2H2-type zinc finger
	gene-PDE_07029	PDE_07029	hypothetical protein	6.23	5.26	7.13	11.85	12.26	12.06	3.59	4.33	4.24	6.20667	12.0567	4.05333	GO:0005634;GO:0016021;GO:0008270;GO:0000981	CC:nucleus;CC:integral component of membrane;MF:zinc ion binding;MF:RNA polymerase II transcription factor activity, sequence-specific DNA binding;	------	------	------	------	ENOG410YGWN;ENOG4110XT8;ENOG410YYXV	S:Function unknown;	EPS32070.1	hypothetical protein PDE_07029 [Penicillium oxalicum 114-2]	sp|Q9UT46|MOC3_SCHPO;	Transcriptional regulatory protein moc3 OS=Schizosaccharomyces pombe;	PF00172.18;PF11951.8	Zn_clus;Fungal_trans_2	Fungal Z;Fungal specific transcription factor domain
	gene-PDE_07250	PDE_07250	hypothetical protein	16.74	15.57	16.23	22.03	24.77	21.36	5	4.44	5.48	16.18	22.72	4.97333	GO:0005975;GO:0030259;GO:0005634;GO:0008270;GO:0016758;GO:0000981	BP:carbohydrate metabolic process;BP:lipid glycosylation;CC:nucleus;MF:zinc ion binding;MF:transferase activity, transferring hexosyl groups;MF:RNA polymerase II transcription factor activity, sequence-specific DNA binding;	------	------	------	------	ENOG4111MJH;ENOG410ZKRJ	S:Function unknown;	EPS32290.1	hypothetical protein PDE_07250 [Penicillium oxalicum 114-2]	sp|Q05958|ECM22_YEAST;	Sterol regulatory element-binding protein ECM22 OS=Saccharomyces cerevisiae;	PF00172.18;PF11951.8	Zn_clus;Fungal_trans_2	Fungal Z;Fungal specific transcription factor domain
	gene-PDE_00895	PDE_00895	hypothetical protein	100.52	95.51	95.83	125.97	133.82	96.39	42.06	41.92	48.09	97.2867	118.727	44.0233	GO:0003676;GO:0003677	MF:nucleic acid binding;MF:DNA binding;	------	------	------	------	COG5048	S:Function unknown	EPS25959.1	hypothetical protein PDE_00895 [Penicillium oxalicum 114-2]	------	------	PF13465.6;PF00096.26;PF13894.6;PF13912.6	zf-H2C2_2;zf-C2H2;zf-C2H2_4;zf-C2H2_6	Zinc-finger double domain;Zinc finger, C2H2 type;C2H2-type zinc finger;C2H2-type zinc finger
	gene-PDE_03264	PDE_03264	hypothetical protein	286.41	277.26	274.02	371.04	396.2	362.98	128.61	116.83	135	279.23	376.74	126.813	GO:0003700	MF:transcription factor activity, sequence-specific DNA binding;	K09043	YAP	------	------	ENOG410YCPJ	K:Transcription	EPS28318.1	hypothetical protein PDE_03264 [Penicillium oxalicum 114-2]	sp|Q5AW17|AP1_EMENI;	AP-1-like transcription factor napA OS=Emericella nidulans;	PF08601.10;PF00170.21;PF00769.19	PAP1;bZIP_1;ERM	Transcription factor PAP1;bZIP transcription factor;Ezrin/radixin/moesin family
	gene-PDE_07392	PDE_07392	hypothetical protein	70.02	70.92	62.82	83.97	94.17	85.39	32.14	31	37.39	67.92	87.8433	33.51	GO:0007165;GO:0003700;GO:0003677	BP:signal transduction;MF:transcription factor activity, sequence-specific DNA binding;MF:DNA binding;	------	------	------	------	ENOG411299A;ENOG4111CH5	K:Transcription;	EPS32432.1	hypothetical protein PDE_07392 [Penicillium oxalicum 114-2]	sp|Q4WVQ7|ATFB_ASPFU;	Basic leucine zipper;	PF00170.21;PF07716.15	bZIP_1;bZIP_2	bZIP transcription factor;Basic region leucine zipper
	gene-PDE_04501	PDE_04501	hypothetical protein	1.82	1.62	1.51	2.73	2.12	1.87	0.46	0.46	0.47	1.65	2.24	0.463333	GO:0003700	MF:transcription factor activity, sequence-specific DNA binding;	------	------	------	------	ENOG4110B0P	S:Function unknown	EPS29551.1	hypothetical protein PDE_04501 [Penicillium oxalicum 114-2]	sp|A4DA05|XANC_ASPFU;	Xanthocillin biosynthesis cluster transcription factor xanC OS=Neosartorya fumigata;	------	------	------
	gene-PDE_04782	PDE_04782	hypothetical protein	4.24	5.01	3.94	6.69	5.79	4.85	1.29	1.38	0.52	4.39667	5.77667	1.06333	GO:0005634;GO:0003676;GO:0000981;GO:0008270	CC:nucleus;MF:nucleic acid binding;MF:RNA polymerase II transcription factor activity, sequence-specific DNA binding;MF:zinc ion binding;	------	------	------	------	ENOG410YH5X;ENOG410YRQ9	S:Function unknown;	EPS29832.1	hypothetical protein PDE_04782 [Penicillium oxalicum 114-2]	------	------	PF00172.18	Zn_clus	Fungal Z
	gene-PDE_06594	PDE_06594	hypothetical protein	1.99	1.51	1.19	3.02	2.58	2.44	0.34	0.25	0.39	1.56333	2.68	0.326667	GO:0015074;GO:0000943;GO:0008270;GO:0003676	BP:DNA integration;CC:retrotransposon nucleocapsid;MF:zinc ion binding;MF:nucleic acid binding;	------	------	------	------	------	------	EPS31639.1	hypothetical protein PDE_06594 [Penicillium oxalicum 114-2]	------	------	------	------	------
	gene-PDE_02773	PDE_02773	hypothetical protein	4.28	8.17	8.98	1.82	6.41	4.53	1.56	4.47	4.92	7.14333	4.25333	3.65	GO:0006351;GO:0005634;GO:0008270;GO:0000981;GO:0003677	BP:transcription, DNA-templated;CC:nucleus;MF:zinc ion binding;MF:RNA polymerase II transcription factor activity, sequence-specific DNA binding;MF:DNA binding;	------	------	------	------	ENOG410ZT9S;ENOG410Y98U	K:Transcription;	EPS27829.1	hypothetical protein PDE_02773 [Penicillium oxalicum 114-2]	sp|Q4I0C5|RDR1_GIBZE;	Protein RDR1 OS=Gibberella zeae;	PF00172.18;PF04082.18	Zn_clus;Fungal_trans	Fungal Z;Fungal specific transcription factor domain
	gene-PDE_02064	PDE_02064	hypothetical protein	74.98	72.44	75.88	104.95	106.57	106.97	6.22	5.98	6.45	74.4333	106.163	6.21667	GO:0003700	MF:transcription factor activity, sequence-specific DNA binding;	------	------	------	------	------	------	EPS27122.1	hypothetical protein PDE_02064 [Penicillium oxalicum 114-2]	------	------	PF00170.21;PF06785.11	bZIP_1;UPF0242	bZIP transcription factor;Uncharacterised protein family
	gene-PDE_08084	PDE_08084	hypothetical protein	17.37	19.3	18.59	16.84	15.43	11.78	2.26	2.57	2.63	18.42	14.6833	2.48667	GO:0005634;GO:0008270;GO:0000981;GO:0003677	CC:nucleus;MF:zinc ion binding;MF:RNA polymerase II transcription factor activity, sequence-specific DNA binding;MF:DNA binding;	------	------	------	------	ENOG410YHG6	S:Function unknown	EPS33122.1	hypothetical protein PDE_08084 [Penicillium oxalicum 114-2]	sp|C9K7C2|AMTR1_ALTAL;	Transcription activator AMTR1 OS=Alternaria alternata OX=5599 GN=AMTR1 PE=2 SV=1;	PF00172.18	Zn_clus	Fungal Z
	gene-PDE_03168	PDE_03168	catabolite repressor CreA	154.7	148.89	149.07	255.84	263.88	207.07	0.05	0.05	0	150.887	242.263	0.033333	GO:0003676;GO:0003677	MF:nucleic acid binding;MF:DNA binding;	K09467	MIG	------	------	COG5048	S:Function unknown	ABY76182.1	carbon catabolite repressor [Penicillium decumbens]	sp|Q01981|CREA_EMENI;	DNA-binding protein creA OS=Emericella nidulans;	PF13465.6;PF00096.26	zf-H2C2_2;zf-C2H2	Zinc-finger double domain;Zinc finger, C2H2 type
	gene-PDE_06407	PDE_06407	hypothetical protein	20.85	20.27	19.63	23.01	21.62	21.2	5.41	5.85	5.65	20.25	21.9433	5.63667	GO:0018345;GO:0016021;GO:0005789;GO:0019706	BP:protein palmitoylation;CC:integral component of membrane;CC:endoplasmic reticulum membrane;MF:protein-cysteine S-palmitoyltransferase activity;	K18932	ZDHHC	------	------	COG5273	S:Function unknown	EPS31452.1	hypothetical protein PDE_06407 [Penicillium oxalicum 114-2]	sp|Q4WC37|PFA4_ASPFU;	Palmitoyltransferase pfa4 OS=Neosartorya fumigata;	PF01529.20	DHHC	DHHC palmitoyltransferase
	gene-PDE_05681	PDE_05681	hypothetical protein	5.16	4.55	3.46	3.68	3.37	3.52	1.26	0.94	0.76	4.39	3.52333	0.986667	GO:0005634;GO:0008270;GO:0000981	CC:nucleus;MF:zinc ion binding;MF:RNA polymerase II transcription factor activity, sequence-specific DNA binding;	------	------	------	------	ENOG410YD5R;ENOG410XTZC;ENOG410Z468	S:Function unknown;	EPS30729.1	hypothetical protein PDE_05681 [Penicillium oxalicum 114-2]	------	------	PF00172.18;PF11951.8	Zn_clus;Fungal_trans_2	Fungal Z;Fungal specific transcription factor domain
C4	gene-PDE_06913	PDE_06913	hypothetical protein	35.41	36.92	35.45	25.61	26	22.15	87.87	84.34	91.43	35.9267	24.5867	87.88	GO:0006351;GO:0005634;GO:0008270;GO:0000981;GO:0003677	BP:transcription, DNA-templated;CC:nucleus;MF:zinc ion binding;MF:RNA polymerase II transcription factor activity, sequence-specific DNA binding;MF:DNA binding;	------	------	------	------	ENOG4111YCA	K:Transcription	EPS31954.1	hypothetical protein PDE_06913 [Penicillium oxalicum 114-2]	sp|P04386|GAL4_YEAST;	Regulatory protein GAL4 OS=Saccharomyces cerevisiae;	PF04082.18	Fungal_trans	Fungal specific transcription factor domain
	gene-PDE_04481	PDE_04481	hypothetical protein	20.31	22.05	18.78	29.16	30.24	24.53	69.08	66.67	78.03	20.38	27.9767	71.26	GO:0005634;GO:0003824;GO:0008270;GO:0000981;GO:0003677	CC:nucleus;MF:catalytic activity;MF:zinc ion binding;MF:RNA polymerase II transcription factor activity, sequence-specific DNA binding;MF:DNA binding;	------	------	------	------	ENOG4110Z9H	S:Function unknown	EPS29531.1	hypothetical protein PDE_04481 [Penicillium oxalicum 114-2]	sp|P38141|THI2_YEAST;	Thiamine biosynthesis regulatory protein OS=Saccharomyces cerevisiae;	PF11951.8;PF00172.18	Fungal_trans_2;Zn_clus	Fungal specific transcription factor domain;Fungal Z
	gene-PDE_07172	PDE_07172	hypothetical protein	4.88	4.51	3.93	2.4	2.12	2.58	10.14	9.49	9.87	4.44	2.36667	9.83333	GO:0043609;GO:0006351;GO:0045893;GO:0005634;GO:0016021;GO:0003677;GO:0000981;GO:0008270	BP:regulation of carbon utilization;BP:transcription, DNA-templated;BP:positive regulation of transcription, DNA-templated;CC:nucleus;CC:integral component of membrane;MF:DNA binding;MF:RNA polymerase II transcription factor activity, sequence-specific DNA binding;MF:zinc ion binding;	K21451	XLNR	------	------	ENOG410YA8D	U:Intracellular trafficking, secretion, and vesicular transport	EPS32212.1	hypothetical protein PDE_07172 [Penicillium oxalicum 114-2]	sp|A1C7P9|XLNR_ASPCL;	Xylanolytic transcriptional activator xlnR OS=Aspergillus clavatus;	PF04082.18;PF00172.18	Fungal_trans;Zn_clus	Fungal specific transcription factor domain;Fungal Z
	gene-PDE_09437	PDE_09437	hypothetical protein	9.03	8.77	7.83	9.61	11.28	9.05	21.41	22.4	20.68	8.54333	9.98	21.4967	GO:0006351;GO:0005634;GO:0016021;GO:0003677;GO:0000981;GO:0008270	BP:transcription, DNA-templated;CC:nucleus;CC:integral component of membrane;MF:DNA binding;MF:RNA polymerase II transcription factor activity, sequence-specific DNA binding;MF:zinc ion binding;	------	------	------	------	ENOG410XP75	K:Transcription	EPS34473.1	hypothetical protein PDE_09437 [Penicillium oxalicum 114-2]	------	------	PF04082.18	Fungal_trans	Fungal specific transcription factor domain
	gene-PDE_06057	PDE_06057	hypothetical protein	13.83	9.32	7.69	9.99	10.53	11.16	22.68	23.02	24.93	10.28	10.56	23.5433	GO:0005975;GO:0030245;GO:0006351;GO:0005634;GO:0016021;GO:0004553;GO:0003677;GO:0000981;GO:0008270	BP:carbohydrate metabolic process;BP:cellulose catabolic process;BP:transcription, DNA-templated;CC:nucleus;CC:integral component of membrane;MF:hydrolase activity, hydrolyzing O-glycosyl compounds;MF:DNA binding;MF:RNA polymerase II transcription factor activity, sequence-specific DNA binding;MF:zinc ion binding;	------	------	------	------	ENOG410YBV4	S:Function unknown	EPS31102.1	hypothetical protein PDE_06057 [Penicillium oxalicum 114-2]	sp|Q10086|YAO7_SCHPO;	Uncharacterized transcriptional regulatory protein C11D3.07c OS=Schizosaccharomyces pombe;	PF04082.18;PF00172.18	Fungal_trans;Zn_clus	Fungal specific transcription factor domain;Fungal Z
	gene-PDE_06088	PDE_06088	hypothetical protein	11.64	10.03	9.93	13.41	13.16	11.73	20.99	20.5	22.22	10.5333	12.7667	21.2367	GO:0006351;GO:0005634;GO:0008270;GO:0000981;GO:0003677	BP:transcription, DNA-templated;CC:nucleus;MF:zinc ion binding;MF:RNA polymerase II transcription factor activity, sequence-specific DNA binding;MF:DNA binding;	------	------	------	------	ENOG4110F3C	S:Function unknown	EPS31133.1	hypothetical protein PDE_06088 [Penicillium oxalicum 114-2]	sp|Q1MTM9|YFN1_SCHPO;	Uncharacterized transcriptional regulatory protein C1327.01c OS=Schizosaccharomyces pombe;	PF04082.18;PF00172.18	Fungal_trans;Zn_clus	Fungal specific transcription factor domain;Fungal Z
	gene-PDE_01570	PDE_01570	hypothetical protein	14.54	13.1	14.39	17.3	18.74	17.28	29.03	27.98	29.04	14.01	17.7733	28.6833	GO:0006351;GO:0005634;GO:0003677;GO:0008233;GO:0000981;GO:0008270	BP:transcription, DNA-templated;CC:nucleus;MF:DNA binding;MF:peptidase activity;MF:RNA polymerase II transcription factor activity, sequence-specific DNA binding;MF:zinc ion binding;	------	------	------	------	ENOG410Z8RR	S:Function unknown	EPS26632.1	hypothetical protein PDE_01570 [Penicillium oxalicum 114-2]	sp|Q5B8L0|PRTT_EMENI;	Transcriptional activator of proteases prtT OS=Emericella nidulans;	PF00172.18	Zn_clus	Fungal Z
	gene-PDE_05919	PDE_05919	hypothetical protein	14.89	13.06	15.01	16.68	15.74	13.91	24.88	23.7	30.19	14.32	15.4433	26.2567	GO:0006351;GO:0005634;GO:0008270;GO:0003677	BP:transcription, DNA-templated;CC:nucleus;MF:zinc ion binding;MF:DNA binding;	------	------	------	------	ENOG4110B4T	K:Transcription	EPS30965.1	hypothetical protein PDE_05919 [Penicillium oxalicum 114-2]	sp|P52959|CTF1B_FUSSO;	Cutinase transcription factor 1 beta OS=Fusarium solani subsp. pisi OX=70791 GN=CTF1-BETA PE=2 SV=1;	PF04082.18	Fungal_trans	Fungal specific transcription factor domain
	gene-PDE_09536	PDE_09536	hypothetical protein	0.7	0.95	0.68	0.7	1.34	0.67	4.02	5.26	3.53	0.776667	0.903333	4.27	GO:0005975;GO:0006351;GO:0005634;GO:0003677;GO:0004553;GO:0000981;GO:0008270	BP:carbohydrate metabolic process;BP:transcription, DNA-templated;CC:nucleus;MF:DNA binding;MF:hydrolase activity, hydrolyzing O-glycosyl compounds;MF:RNA polymerase II transcription factor activity, sequence-specific DNA binding;MF:zinc ion binding;	------	------	------	------	ENOG41120ZI	S:Function unknown	EPS34572.1	hypothetical protein PDE_09536 [Penicillium oxalicum 114-2]	sp|Q1ERI1|CTNR_MONPU;	Citrinin biosynthesis transcriptional activator ctnR OS=Monascus purpureus OX=5098 GN=ctnR PE=3 SV=1;	PF04082.18;PF00172.18	Fungal_trans;Zn_clus	Fungal specific transcription factor domain;Fungal Z
	gene-PDE_00959	PDE_00959	hypothetical protein	55.79	56.09	52.8	28.19	30.24	21.95	58.16	58.64	65.79	54.8933	26.7933	60.8633	GO:0006351;GO:0005634;GO:0008270;GO:0000981;GO:0003677	BP:transcription, DNA-templated;CC:nucleus;MF:zinc ion binding;MF:RNA polymerase II transcription factor activity, sequence-specific DNA binding;MF:DNA binding;	------	------	------	------	ENOG410YEXU	S:Function unknown	EPS26023.1	hypothetical protein PDE_00959 [Penicillium oxalicum 114-2]	sp|P52959|CTF1B_FUSSO;	Cutinase transcription factor 1 beta OS=Fusarium solani subsp. pisi OX=70791 GN=CTF1-BETA PE=2 SV=1;	PF04082.18;PF00172.18	Fungal_trans;Zn_clus	Fungal specific transcription factor domain;Fungal Z
